# Supplementary material for: Preparation of seven-coordinated hypervalent tin(iv)-fused azobenzene and applications for stimuli-responsive π-conjugated polymer films
Source: Royal Society of Chemistry journal article supplement (doi:10.1039/d4dt01738b), 2024-01-01
Supplement: d4dt01738b1.pdf [file d4dt01738b1.pdf]

**Electronic Supplementary Information**

**Preparation of Seven-Coordinated Hypervalent Tin(IV)-Fused Azobenzene and Applications for Stimuli-Responsive  $\pi$ -Conjugated Polymer Films**

Masayuki Gon, Yusuke Morisaki, Kazuya Tanimura, and Kazuo Tanaka\*

*Department of Polymer Chemistry, Graduate School of Engineering, Kyoto University Katsura, Nishikyo-ku, Kyoto 615-8510, Japan*

E-mail: tanaka@poly.synchem.kyoto-u.ac.jp

**Key words:** tin; azobenzene; hypervalent bond; chemical sensor; chromism

|                                                                   |      |
|-------------------------------------------------------------------|------|
| <b>Contents</b>                                                   | page |
| General                                                           | S-3  |
| Materials                                                         | S-4  |
| Synthetic procedures and characterization                         | S-5  |
| Synthesis of <b>P-TAz</b>                                         | S-5  |
| Single crystal X-ray structure analysis                           | S-8  |
| Analysis of <b>TAz</b>                                            | S-8  |
| Analysis of <b>TAz-EDA</b>                                        | S-10 |
| Selected bond lengths, angles and torsion angles                  | S-12 |
| UV-vis absorption and PL titration spectra                        | S-13 |
| Determination of binding constant                                 | S-15 |
| Computational details for theoretical calculation                 | S-18 |
| Detailed information on vapochromism                              | S-21 |
| Detailed information on thermochromism                            | S-23 |
| References                                                        | S-24 |
| Coordinates for optimized structures with theoretical calculation | S-25 |

## General

$^1\text{H}$ ,  $^{13}\text{C}\{^1\text{H}\}$  and  $^{119}\text{Sn}$  NMR spectra were recorded on JEOL ECZ400, ECZ400S and ECZ500R instruments at 400, 100 and 186 MHz, respectively. Samples were analyzed in  $\text{CDCl}_3$  and benzene- $d_6$ , and the chemical shift values were expressed relative to benzene or  $\text{Me}_4\text{Si}$  as an internal standard in  $\text{CDCl}_3$  for  $^1\text{H}$ ,  $^{13}\text{C}\{^1\text{H}\}$  NMR.  $^{119}\text{Sn}$  NMR spectra were measured using double NMR tube. The benzene, PA, EDA or DMSO solution of **TAz** were placed in external tube and benzene- $d_6$  in inner tube. The chemical shift values were expressed relative to  $\text{Me}_4\text{Sn}$  as an external capillary standard. Gel permeation chromatography (GPC) was carried out on a Shimadzu Prominence system equipped with three consecutive polystyrene gel columns (TOSOH TSKgel: G4000H<sub>XL</sub>, G3000H<sub>XL</sub>, G2500H<sub>XL</sub>) using chloroform as an eluent after calibration with standard polystyrene samples. High-resolution mass spectrometry (HRMS) was performed at the Technical Support Office (Department of Synthetic Chemistry and Biological Chemistry, Graduate School of Engineering, Kyoto University), and the HRMS spectra were obtained on a Thermo Fisher Scientific EXACTIVE spectrometer for electrospray ionization (ESI) and a Bruker Daltonics ultrafleXtreme for matrix assisted laser desorption ionization (MALDI) (negative, matrix: *trans*-2-[3-(4-*tert*-butylphenyl)-2-methyl-2-propenylidene]malononitrile (DCTB)). UV-vis spectra were recorded on a SHIMADZU UV-3600i Plus spectrophotometer, and samples were analyzed at room temperature or valuable temperature (VT) with an Oxford Optistat DN2 under  $\text{N}_2$ . HORIBA JOBIN YVON Fluorolog-3 was used for PL spectra at room temperature under air or VT with an Oxford Optistat DN2 under  $\text{N}_2$ . Absolute photoluminescence quantum efficiency ( $\Phi_{\text{PL}}$ ) was recorded on a Hamamatsu Photonics Quantaaurus-QY Plus C13534-01. IKA C-MAG HS 7 digital was used as a hot stirrer. X-ray crystallographic analysis was carried out by Rigaku Saturn 724+ with MicroMax-007HF CCD diffractometer with Varimax Mo optics using graphite-monochromated  $\text{MoK}\alpha$  radiation. A symmetry-related absorption correction was carried out by using the program ABSCOR.<sup>1</sup> The analysis was carried out with Yadokari-XG.<sup>2</sup> The program ORTEP3<sup>3</sup> and Mercury-4.2.0 were used to generate the X-ray structural diagram. Thermogravimetric analysis (TGA) was recorded on a Hitachi High-Tech Science Corporation STA7200RV. Differential scanning calorimetry (DSC) was recorded on a Hitachi High-Tech Science Corporation DSC7020.

## **Materials.**

### Commercially available compounds used without purification:

$\text{Pd}_2(\text{dba})_3$  (dba = dibenzylideneacetone) (Tokyo Chemical Industry Co, Ltd.)

2-Dicyclohexylphosphino-2',4',6'-triisopropylbiphenyl (XPhos) (Strem Chemicals, Inc.)

Propylamine (PA) (FUJIFILM Wako Pure Chemical Corporation)

Ethylenediamine (EDA) (FUJIFILM Wako Pure Chemical Corporation)

*N,N,N',N'*-Tetramethylethylenediamine (TMEDA) (FUJIFILM Wako Pure Chemical Corporation)

*N,N'*-Dimethylethylenediamine (DMEDA) (Tokyo Chemical Industry Co, Ltd.)

1,3-Propanediamine (PDA) (Tokyo Chemical Industry Co, Ltd.)

1,10-Phenanthroline (phen) (FUJIFILM Wako Pure Chemical Corporation)

### Commercially available solvents used without purification:

Toluene (deoxidized grade, FUJIFILM Wako Pure Chemical Corporation)

### Compounds prepared as described in the literatures:

**TAz**<sup>4</sup>

(9,9-Di(2,5,8,11-tetraoxatridecan-13-yl)-9*H*-fluorene-2,7-diyl)bis(trimethylstannane) (**1**)<sup>4</sup>

## Synthetic procedures and characterization

### Synthesis of P-TAz

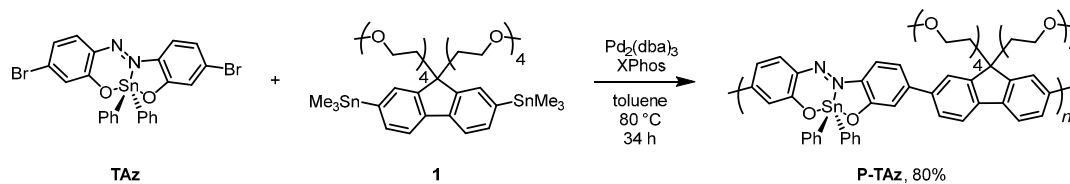

A mixture of **TAz** (0.0643 g, 0.10 mmol, 1 equiv.), **1** (0.0872 g, 0.10 mmol, 1 equiv.), Pd<sub>2</sub>(dba)<sub>3</sub> (0.0027 g, 0.0030 mmol, 0.03 equiv.), XPhos (0.0029 g, 0.006 mmol, 0.06 equiv.) in toluene (2.0 mL) was stirred at 80 °C for 34 h under N<sub>2</sub> atmosphere. After cooling to room temperature, the solution was poured into a large amount of hexane to collect the polymer by filtration to afford **P-TAz** (0.0826 g, 80%) as a black solid.

$M_n = 18,800$ ,  $M_w = 80,400$ ,  $M_w/M_n = 4.3$ . <sup>1</sup>H NMR (CDCl<sub>3</sub>, 400 MHz) δ 8.10 (br), 7.91 (br), 7.84 (br), 7.80 (br), 7.75 (br), 7.47 (br), 7.29 (br), 7.16 (br), 3.55 (br), 3.42 (br), 3.34 (br), 3.34 (br), 3.32 (br), 3.27 (br), 2.90 (br), 2.57 (br) ppm; <sup>13</sup>C{<sup>1</sup>H} NMR (CDCl<sub>3</sub>, 100 MHz) δ 161.8, 150.3, 139.3, 136.4, 135.9, 130.6, 128.9, 121.9, 121.6, 121.0, 118.0, 117.8, 117.6, 117.5, 71.9, 10.5, 70.4, 70.1, 67.1, 59.0, 51.7, 39.9 ppm. The other <sup>13</sup>C{<sup>1</sup>H} signals were not detected due to broadening peaks in a polymer even at high temperature (50 °C). <sup>119</sup>Sn NMR (CDCl<sub>3</sub>, 186 MHz) δ -363.1 (br). The peaks are picked with reference to our previous work including the original NMR spectra of **TAz** and **1**.<sup>4</sup>

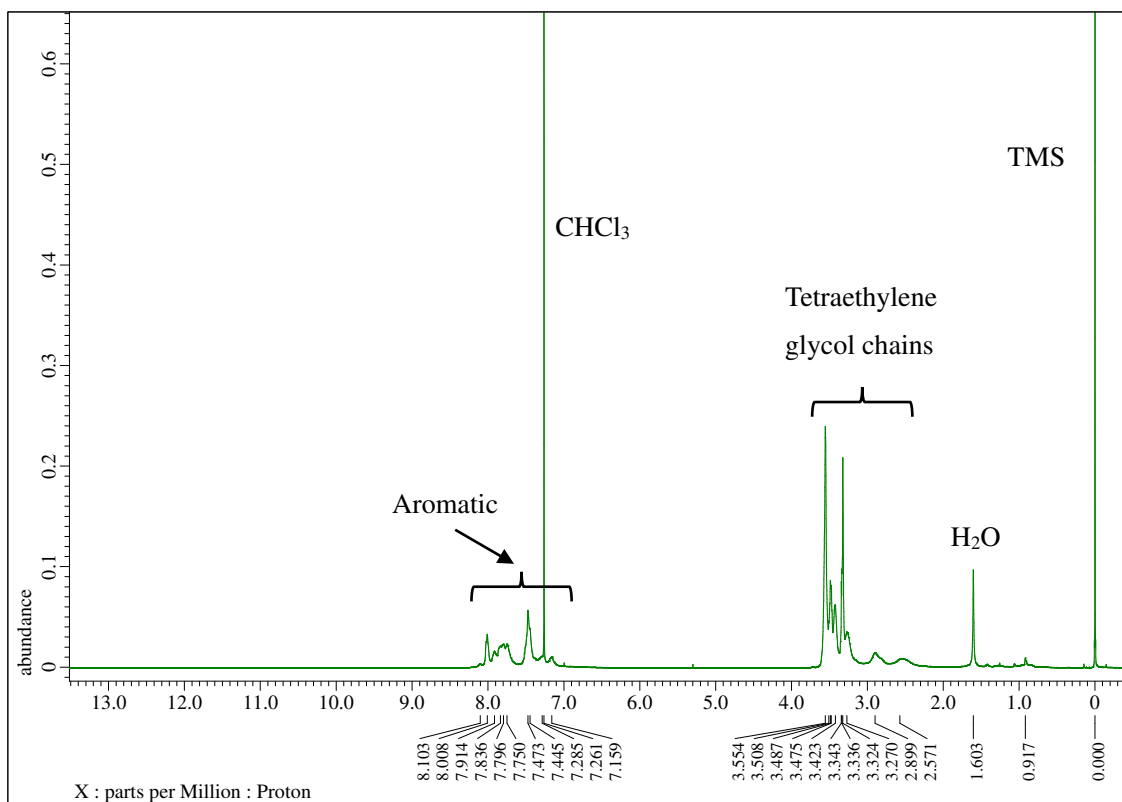

**Chart S1.  $^1\text{H}$  NMR spectrum of P-TAz in  $\text{CDCl}_3$  at 400 MHz.**

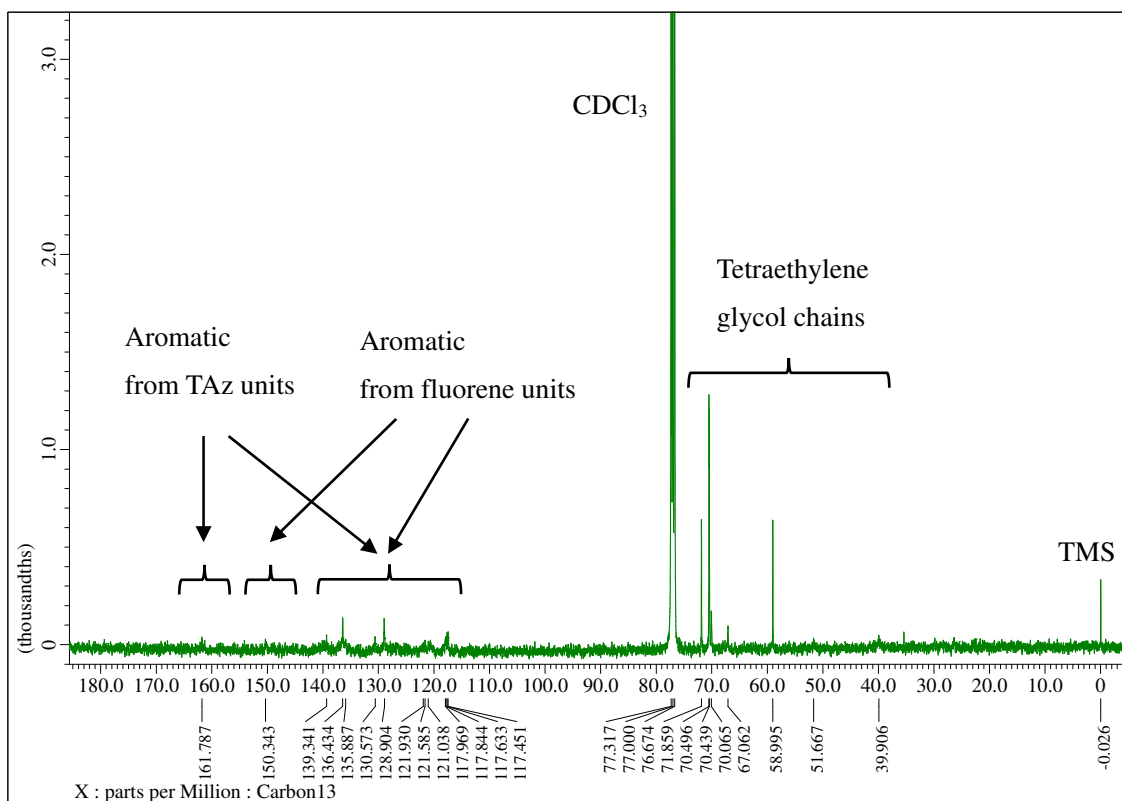

**Chart S2.  $^{13}\text{C}\{^1\text{H}\}$  NMR spectrum of P-TAz in  $\text{CDCl}_3$  at 100 MHz.**

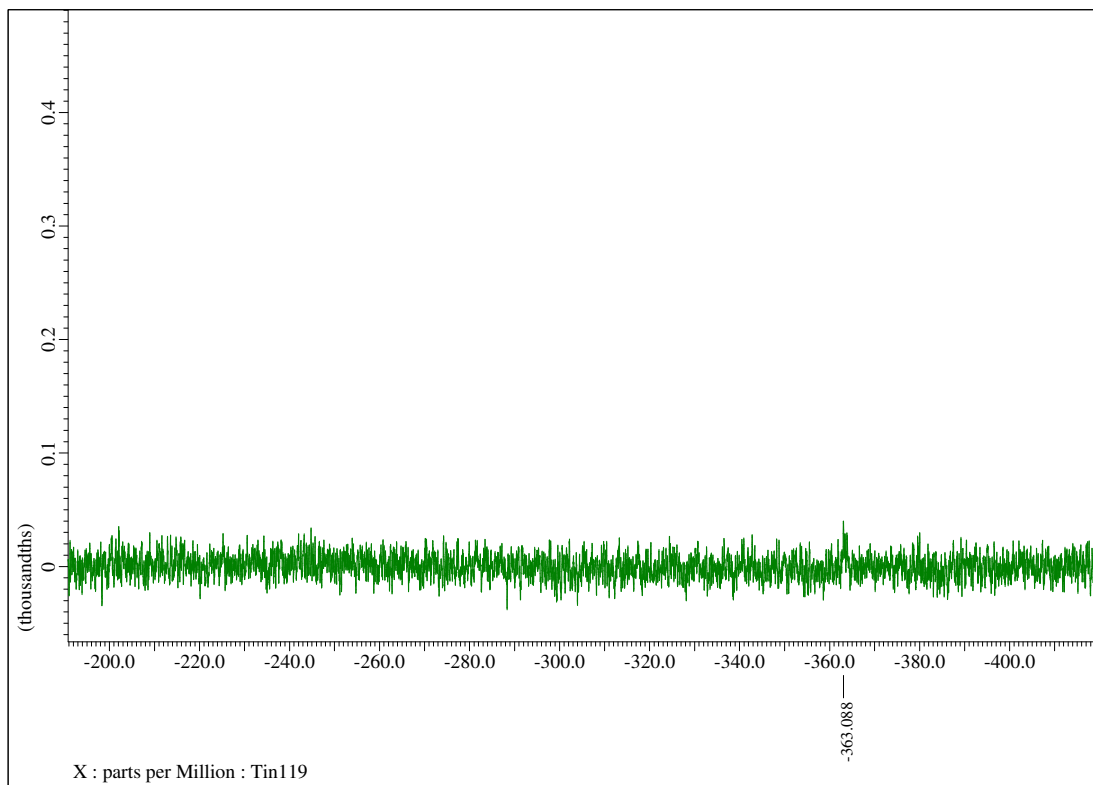

Chart S3.  $^{119}\text{Sn}$  NMR spectrum of **P-TAz** in  $\text{CDCl}_3$  at 186 MHz at 50 °C.

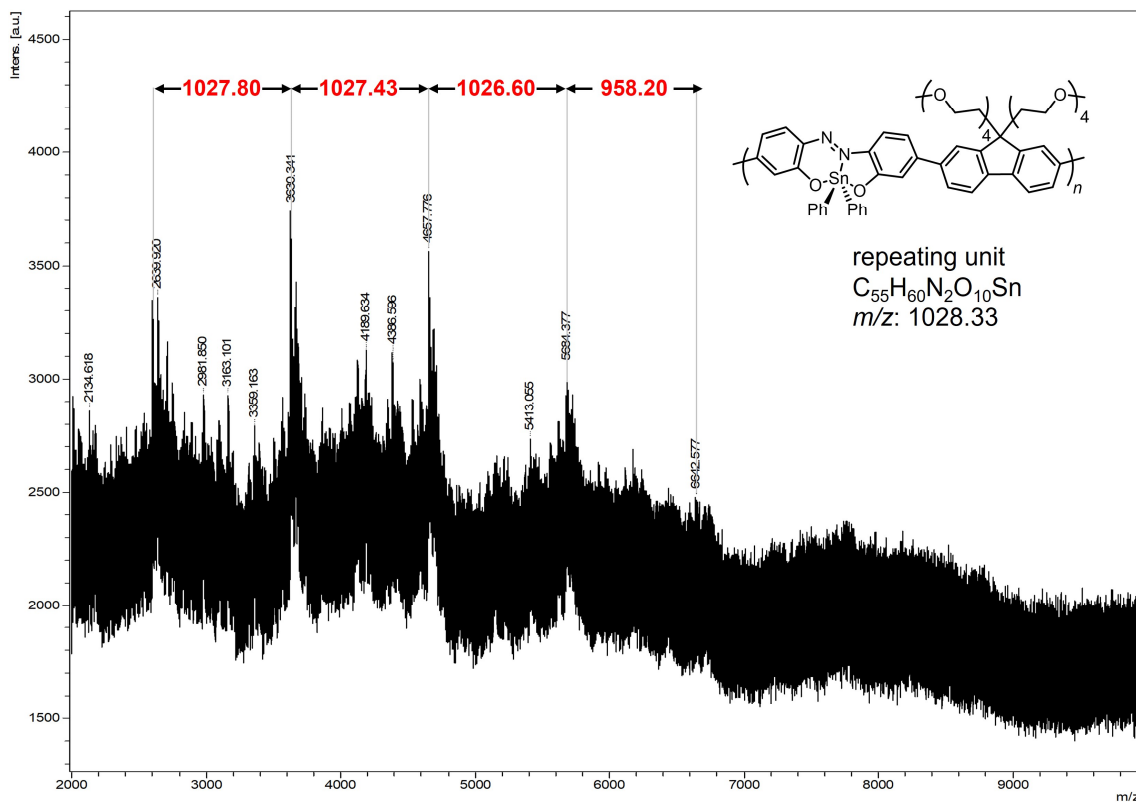

Chart S4. MADLI-TOF MS spectrum of **P-TAz**.

### Single crystal X-ray structure analysis of TAz

Intensity data were collected on a Rigaku Saturn 724+ with MicroMax-007HF CCD diffractometer with Varimax Mo optics using graphite-monochromated Mo K $\alpha$  radiation. The structures were solved and refined by full-matrix least-squares procedures based on  $F^2$  (SHELXL-2018/3).<sup>5</sup>

**Table S1.** Crystallographic data of **TAz**

|                                                   |                                                                                  |                                                                                                                                                   |
|---------------------------------------------------|----------------------------------------------------------------------------------|---------------------------------------------------------------------------------------------------------------------------------------------------|
| Empirical formula                                 | C <sub>24</sub> H <sub>16</sub> Br <sub>2</sub> N <sub>2</sub> O <sub>2</sub> Sn | 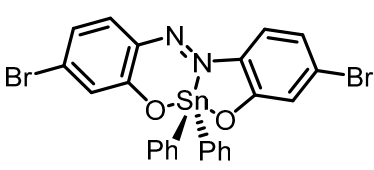 <p style="text-align: center;"><b>TAz</b><br/>CCDC 2349665</p> |
| Formula weight                                    | 642.90                                                                           |                                                                                                                                                   |
| Temperature (K)                                   | 143(2)                                                                           |                                                                                                                                                   |
| Wavelength (Å)                                    | 0.71075                                                                          |                                                                                                                                                   |
| Crystal system, space group                       | Monoclinic, $P2_1/c$                                                             |                                                                                                                                                   |
| Unit cell dimensions (Å)                          | $a = 17.877(7)$<br>$b = 17.298(6)$<br>$c = 7.251(2)$                             |                                                                                                                                                   |
| Unit cell dimensions (°)                          | $\alpha = 90$<br>$\beta = 90.373(5)$<br>$\gamma = 90$                            |                                                                                                                                                   |
| Volume (Å <sup>3</sup> )                          | 2242.2(13)                                                                       |                                                                                                                                                   |
| Z, calculated density (g cm <sup>-3</sup> )       | 4, 1.904                                                                         |                                                                                                                                                   |
| Absorption coefficient                            | 4.727                                                                            |                                                                                                                                                   |
| F(000)                                            | 1240                                                                             |                                                                                                                                                   |
| Crystal size (mm)                                 | 0.16 × 0.07 × 0.02                                                               |                                                                                                                                                   |
| $\theta$ range for data collection (°)            | 3.046–27.493                                                                     |                                                                                                                                                   |
| Limiting indices                                  | $-9 \leq h \leq 8, -22 \leq k \leq 22, -22 \leq l \leq 23$                       |                                                                                                                                                   |
| Reflections collected (unique)                    | 17923/5091 [ $R(\text{int}) = 0.0503$ ]                                          |                                                                                                                                                   |
| Completeness to theta                             | 0.989                                                                            |                                                                                                                                                   |
| Max. and min. transmission                        | 1.000, 0.792                                                                     |                                                                                                                                                   |
| Goodness-of-fit on $F^2$                          | 1.085                                                                            |                                                                                                                                                   |
| Final R indices [ $I > 2\sigma(I)$ ] <sup>a</sup> | $R_1 = 0.0391, wR_2 = 0.0673$                                                    |                                                                                                                                                   |
| R indices (all data)                              | $R_1 = 0.0543, wR_2 = 0.0727$                                                    |                                                                                                                                                   |

<sup>a</sup>  $R_1 = \Sigma(|F_0| - |F_c|) / \Sigma|F_0|$ .  $wR_2 = [\Sigma w(F^2_0 - F^2_c)^2 / \Sigma w(F^2_0)^2]^{1/2}$ .  $w = 1 / [\sigma^2(F^2_0) + (ap)^2 + bp]$ , where  $p = [\max(F^2_0, 0) + 2F^2_c] / 3$ .



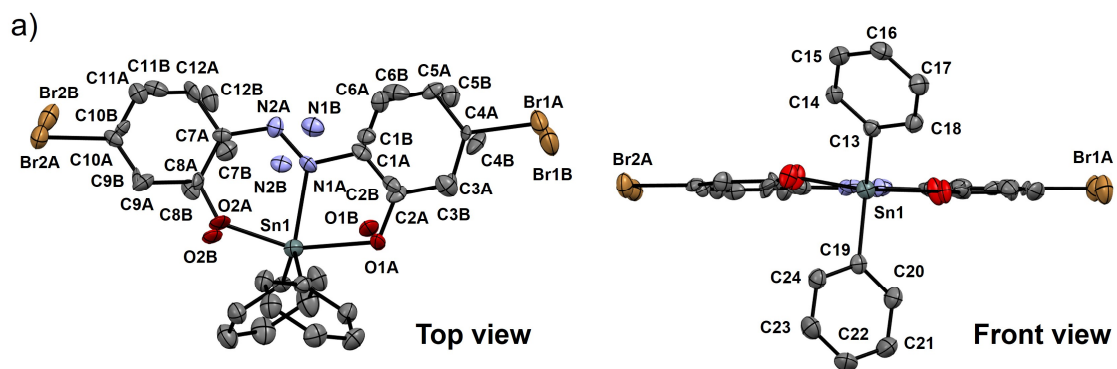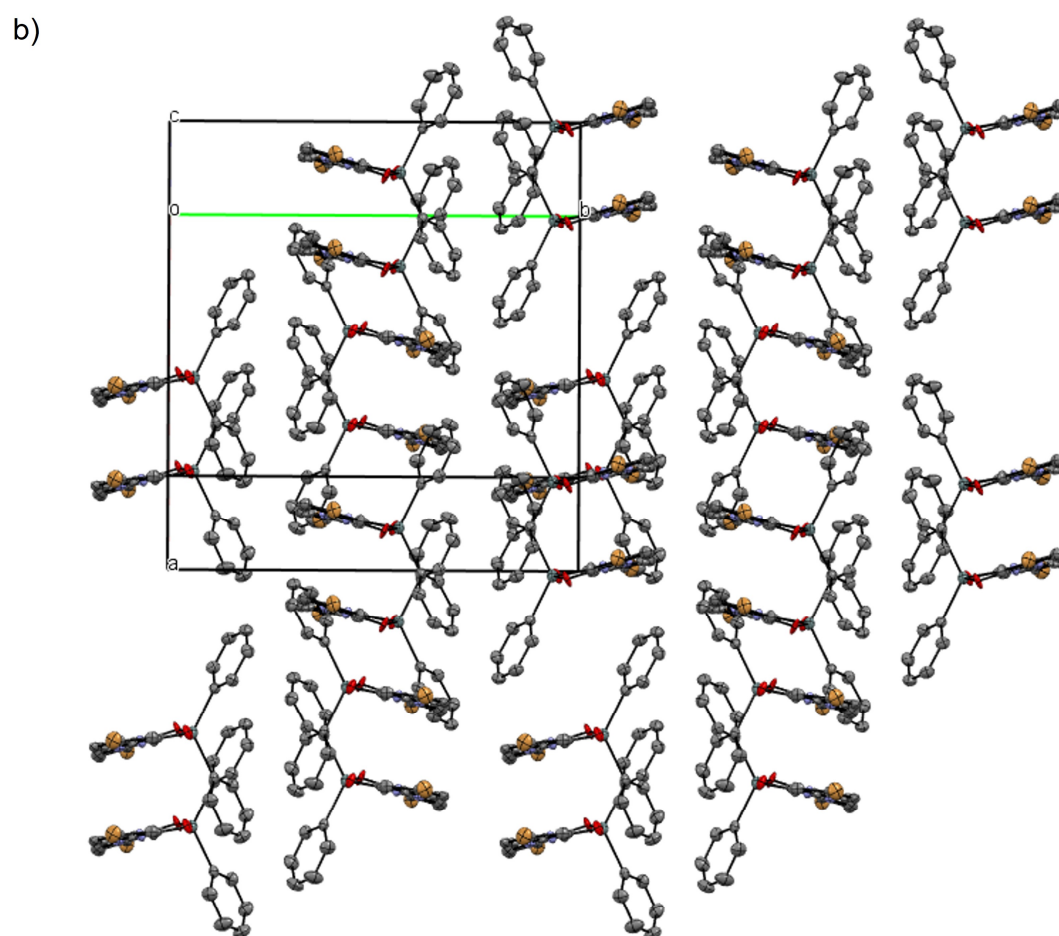

**Figure S1.** a) ORTEP drawings (occupancy of major conformation A: 51%, occupancy of minor conformation B: 49%) and b) packing diagrams of **TAz**. Thermal ellipsoids are scaled to the 50% probability level. Hydrogen atoms are omitted for the clarity.

### Single crystal X-ray structure analysis of TAz-EDA

Intensity data were collected on a Rigaku Saturn 724+ with MicroMax-007HF CCD diffractometer with Varimax Mo optics using graphite-monochromated Mo K $\alpha$  radiation. The structures were solved and refined by full-matrix least-squares procedures based on  $F^2$  (SHELXL-2018/3).<sup>6</sup> Heavily disordered solvent molecules from EDA were removed by using SQUEEZE procedure.<sup>7</sup>

**Table S2.** Crystallographic data of **TAz-EDA**

|                                                   |                                                                                  |
|---------------------------------------------------|----------------------------------------------------------------------------------|
| Empirical formula                                 | C <sub>26</sub> H <sub>24</sub> Br <sub>2</sub> N <sub>4</sub> O <sub>2</sub> Sn |
| Formula weight                                    | 703.00                                                                           |
| Temperature (K)                                   | 143(2)                                                                           |
| Wavelength (Å)                                    | 0.71075                                                                          |
| Crystal system, space group                       | Orthorhombic, $P-1$                                                              |
| Unit cell dimensions (Å)                          | $a = 8.454(4)$<br>$b = 12.256(7)$<br>$c = 14.860(8)$                             |
| Unit cell dimensions (°)                          | $\alpha = 107.396(8)$<br>$\beta = 95.828(4)$<br>$\gamma = 103.868(6)$            |
| Volume (Å <sup>3</sup> )                          | 1401.3(13)                                                                       |
| Z, calculated density (g cm <sup>-3</sup> )       | 2, 1.666                                                                         |
| Absorption coefficient                            | 3.792                                                                            |
| F(000)                                            | 688                                                                              |
| Crystal size (mm)                                 | 0.20 × 0.12 × 0.06                                                               |
| $\theta$ range for data collection (°)            | 3.100–27.484                                                                     |
| Limiting indices                                  | $-10 \leq h \leq 10, -15 \leq k \leq 14, -16 \leq l \leq 19$                     |
| Reflections collected (unique)                    | 11269/6096 [ $R(\text{int}) = 0.0489$ ]                                          |
| Completeness to theta                             | 0.953                                                                            |
| Max. and min. transmission                        | 1.000, 0.544                                                                     |
| Goodness-of-fit on $F^2$                          | 0.988                                                                            |
| Final R indices [ $I > 2\sigma(I)$ ] <sup>a</sup> | $R_1 = 0.0516, wR_2 = 0.0918$                                                    |
| R indices (all data)                              | $R_1 = 0.0691, wR_2 = 0.1018$                                                    |

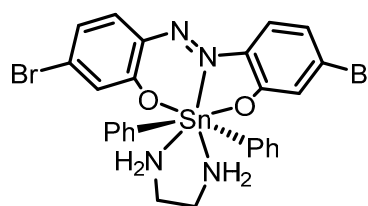

**TAz-EDA**  
CCDC 2349666

<sup>a</sup>  $R_1 = \Sigma(|F_0| - |F_c|) / \Sigma|F_0|$ .  $wR_2 = [\Sigma w(F^2_0 - F^2_c)^2 / \Sigma w(F^2_0)^2]^{1/2}$ .  $w = 1 / [\sigma^2(F^2_0) + (ap)^2 + bp]$ , where  $p = [\max(F^2_0, 0) + 2F^2_c] / 3$ .

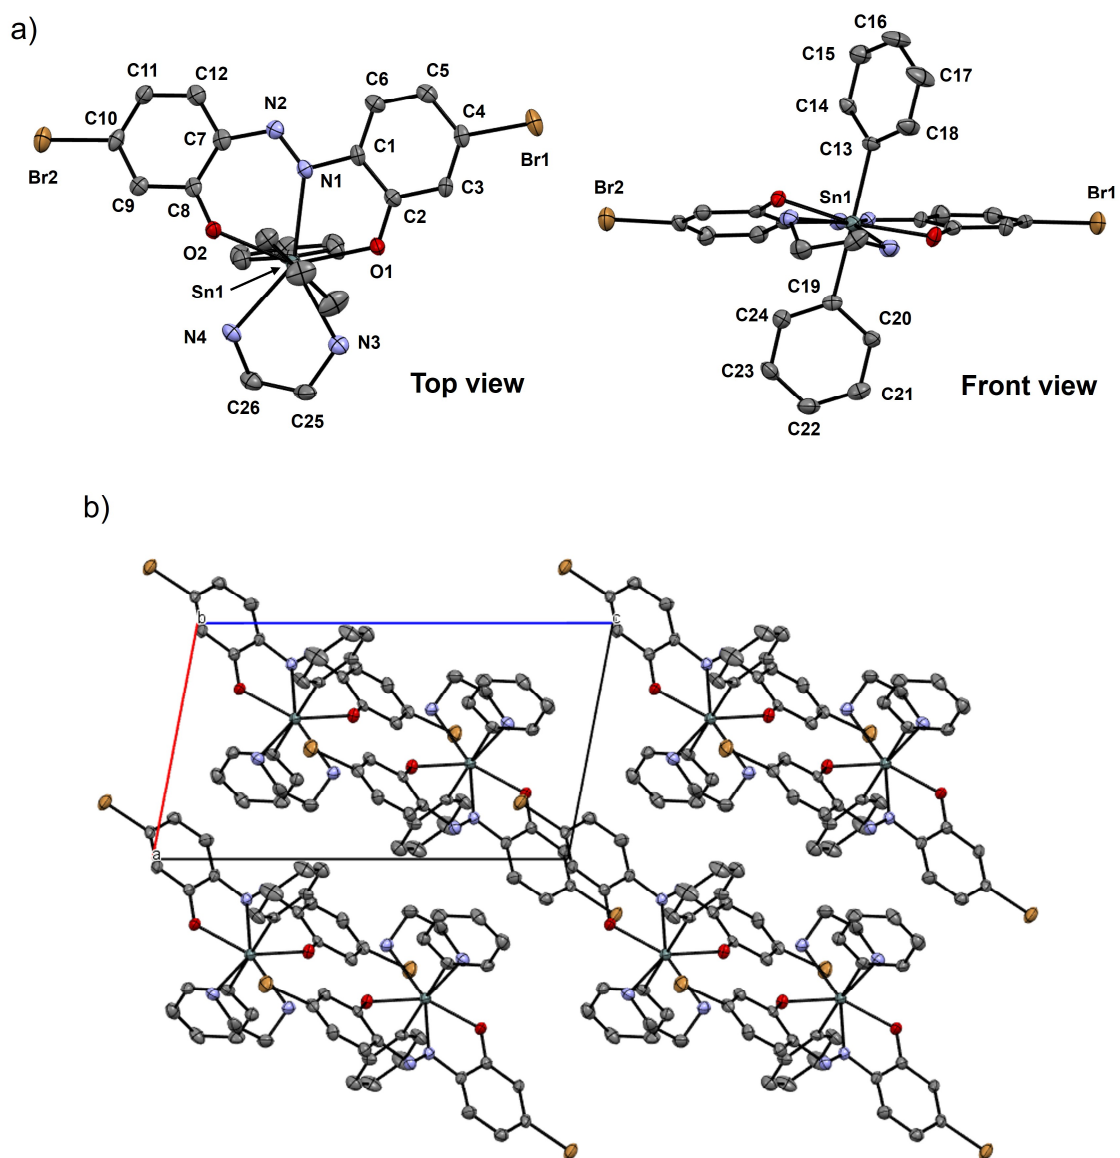

**Figure S2.** a) ORTEP drawings and b) packing diagrams of **Taz-EDA**. Thermal ellipsoids are scaled to the 50% probability level. Hydrogen atoms are omitted for the clarity.

### Selected bond lengths, angles and torsion angles

**Table S3.** Selected bond lengths, angles,  $\tau_5$ , and torsion angles from single crystals.

|                          | <b>TAz (major conformation)</b> | <b>TAz-EDA</b> |
|--------------------------|---------------------------------|----------------|
| <b>Bond / Å</b>          |                                 |                |
| Sn(1)–C(13)              | 2.116(3)                        | 2.140(5)       |
| Sn(1)–C(19)              | 2.109(3)                        | 2.150(5)       |
| Sn(1)–O(1)               | 2.16(2)                         | 2.179(3)       |
| Sn(1)–O(2)               | 2.02(2)                         | 2.230(3)       |
| Sn(1)–N(1)               | 2.231(7)                        | 2.440(5)       |
| N(1)–N(2)                | 1.27(1)                         | 1.276(7)       |
| N(1)–C(1)                | 1.41(2)                         | 1.414(5)       |
| N(2)–C(7)                | 1.38(2)                         | 1.407(5)       |
| O(1)–C(2)                | 1.35(2)                         | 1.326(6)       |
| O(2)–C(8)                | 1.24(3)                         | 1.315(7)       |
| C(1)–C(2)                | 1.41(3)                         | 1.410(7)       |
| C(7)–C(8)                | 1.40(3)                         | 1.416(7)       |
| Sn(1)–N(3)               | –                               | 2.392(6)       |
| Sn(1)–N(4)               | –                               | 2.374(4)       |
| <b>Angle / °</b>         |                                 |                |
| C(13)–Sn(1)–C(19)        | 127.9(1)                        | 178.0(2)       |
| N(1)–Sn(1)–C(13)         | 125.1(2)                        | 91.5(2)        |
| N(1)–Sn(1)–C(19)         | 106.5(2)                        | 86.9(2)        |
| O(1)–Sn(1)–O(2)          | 156.6(7)                        | 144.8(1)       |
| N(1)–Sn(1)–O(1)          | 75.3(4)                         | 71.5(1)        |
| N(1)–Sn(1)–O(2)          | 82.6(6)                         | 73.9(1)        |
| O(1)–Sn(1)–N(3)          | –                               | 73.4(2)        |
| O(2)–Sn(1)–N(4)          | –                               | 71.4(1)        |
| N(3)–Sn(1)–N(4)          | –                               | 70.5(2)        |
| C(13)–Sn(1)–N(3)         | –                               | 87.2(2)        |
| O(13)–Sn(1)–N(4)         | –                               | 88.8(2)        |
| <b>Torsion Angle / °</b> |                                 |                |
| C(1)–N(1)–N(2)–C(7)      | 179(1)                          | 179.8(4)       |
| C(1)–C(2)–O(1)–Sn(1)     | 4(2)                            | –12.7(6)       |
| C(7)–C(8)–O(2)–Sn(1)     | –12(4)                          | –34.4(7)       |
| C(6)–C(1)–N(1)–N(2)      | 4(2)                            | 8.3(7)         |
| N(1)–N(2)–C(7)–C(8)      | 8(2)                            | 12.6(8)        |

### UV-vis absorption and PL titration spectra

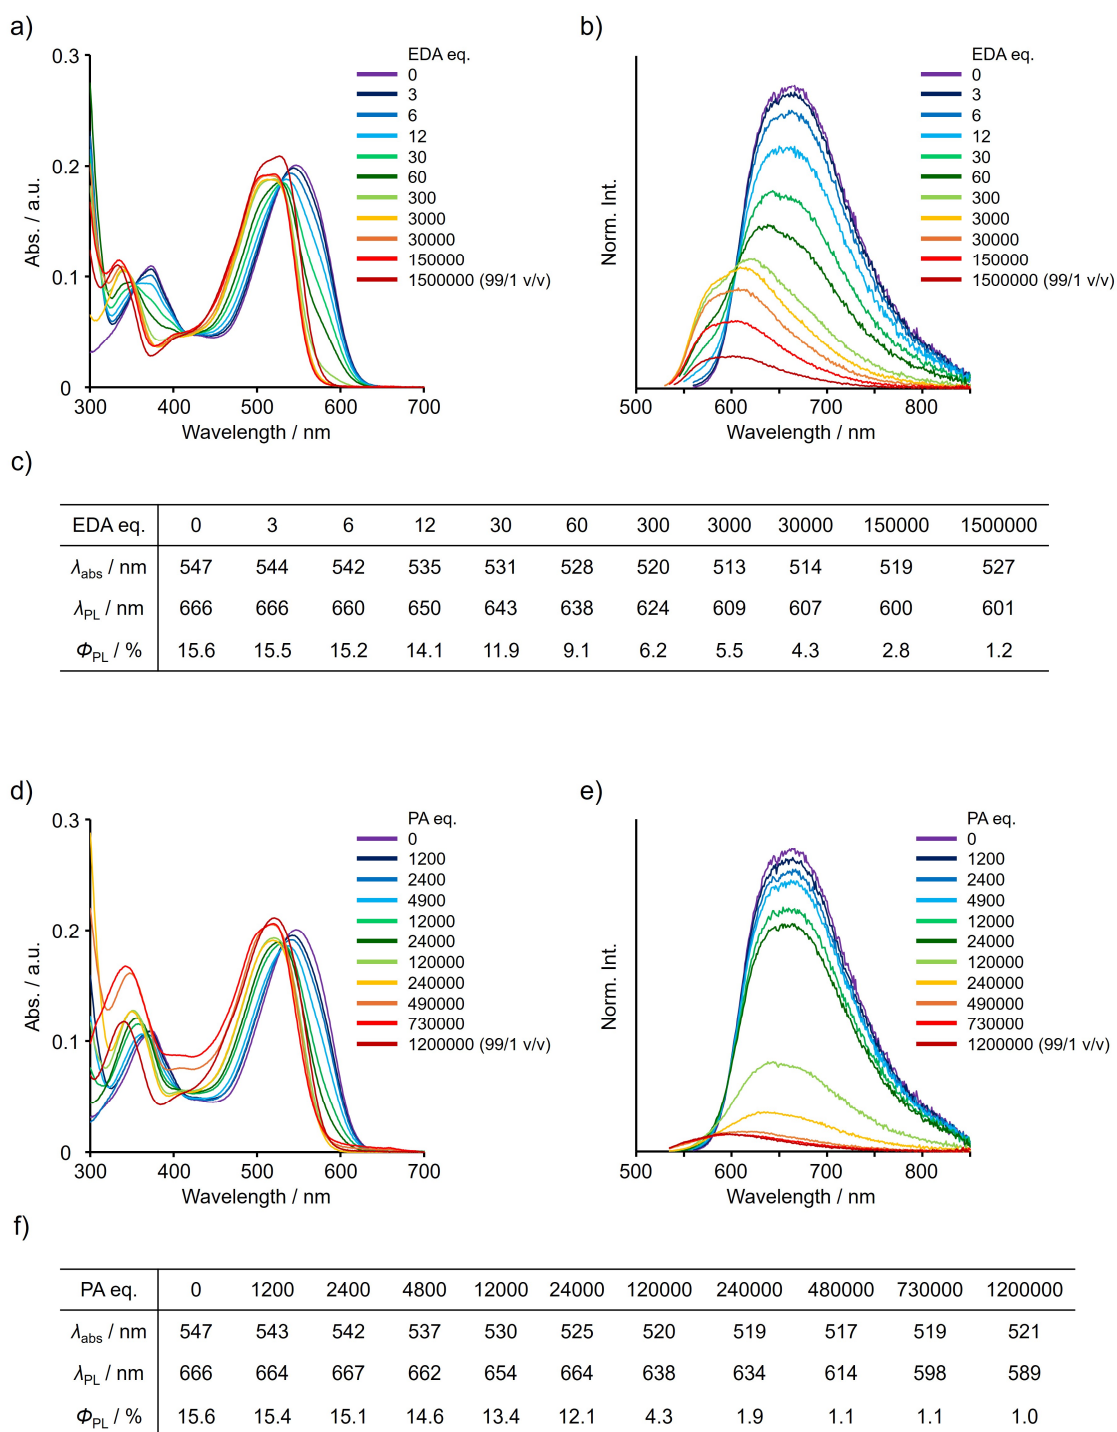

**Figure S3.** a) UV-vis absorption, b) PL titration spectra, and c) spectroscopic data of **TAz** ( $1.0 \times 10^{-5}$  M) to EDA in toluene, excited at  $\lambda_{\text{abs}}$ . d) UV-vis absorption, e) PL titration spectra, and f) spectroscopic data of **TAz** ( $1.0 \times 10^{-5}$  M) to PA in toluene, excited at  $\lambda_{\text{abs}}$ .

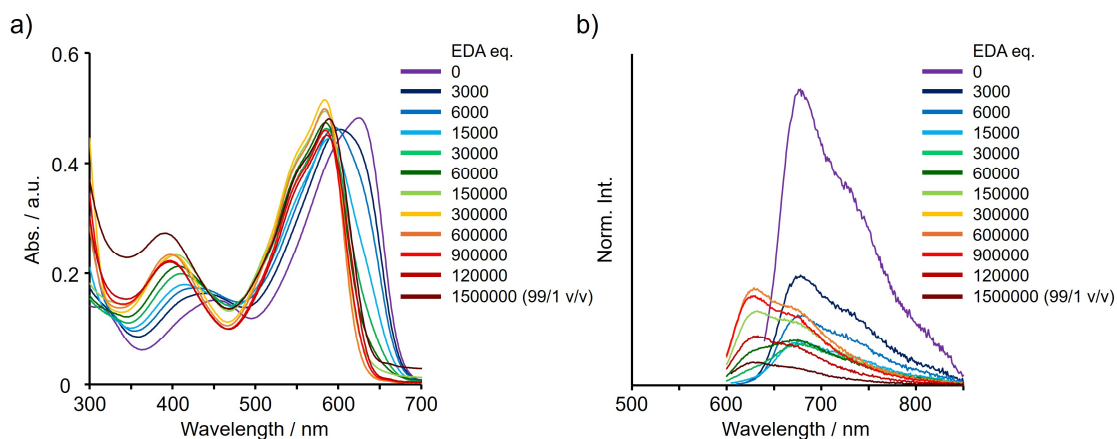

c)

| EDA eq.                            | 0    | 3000 | 6000 | 15000 | 30000 | 60000 | 150000 | 300000 | 600000 | 900000 | 120000 | 1500000 |
|------------------------------------|------|------|------|-------|-------|-------|--------|--------|--------|--------|--------|---------|
| $\lambda_{\text{abs}} / \text{nm}$ | 625  | 602  | 596  | 589   | 586   | 584   | 584    | 584    | 584    | 585    | 586    | 589     |
| $\lambda_{\text{PL}} / \text{nm}$  | 676  | 678  | 683  | 678   | 675   | 675   | 632    | 629    | 630    | 628    | 633    | 629     |
| $\Phi_{\text{PL}} / \%$            | 23.5 | 9.3  | 6.7  | 4.4   | 3.9   | 4.6   | 8.4    | 7.4    | 6.3    | 4.0    | 3.2    | 1.4     |

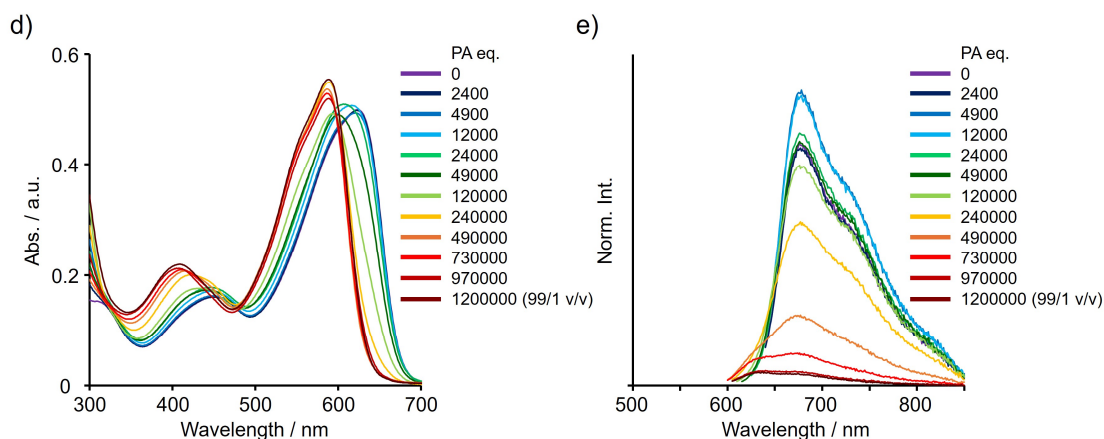

f)

| PA eq.                             | 0    | 2400 | 4900 | 12000 | 24000 | 49000 | 120000 | 240000 | 490000 | 730000 | 970000 | 1200000 |
|------------------------------------|------|------|------|-------|-------|-------|--------|--------|--------|--------|--------|---------|
| $\lambda_{\text{abs}} / \text{nm}$ | 625  | 623  | 621  | 616   | 607   | 600   | 593    | 589    | 587    | 586    | 589    | 589     |
| $\lambda_{\text{PL}} / \text{nm}$  | 676  | 677  | 678  | 678   | 676   | 676   | 676    | 677    | 677    | 677    | 640    | 637     |
| $\Phi_{\text{PL}} / \%$            | 23.5 | 25.1 | 29.1 | 29.1  | 28.9  | 28.5  | 25.7   | 18.7   | 8.1    | 3.6    | 1.6    | 1.0     |

**Figure S4.** a) UV-vis absorption, b) PL titration spectra, and c) spectroscopic data of **P-TAz** ( $1.0 \times 10^{-5}$  M per repeating unit) to EDA in  $\text{CHCl}_3$ , excited at  $\lambda_{\text{abs}}$ . d) UV-vis absorption, e) PL titration spectra, and f) spectroscopic data of **P-TAz** ( $1.0 \times 10^{-5}$  M per repeating unit) to PA in  $\text{CHCl}_3$ , excited at  $\lambda_{\text{abs}}$ .

### Determination of binding constant

Determination of binding constants for **TAz** was carried out by means of an absorption titration technique in toluene at room temperature (25 °C) (Figure S5) according to our previous research.<sup>6</sup> We assumed equilibrium 1:1 binding of **TAz** and ligands (Scheme S1). The concentration of **TAz**,  $[H]_0$  was kept constant and the concentration of guest (ligands),  $[G]$  was varied in non-coordinating solvent, toluene. The mixed solutions of **TAz** and guests were prepared, and UV-vis absorption spectra were recorded. The host-guest complexation immediately reach equilibrium after preparation of the mixed solutions. The binding constants were determined by a non-linear curve fitting analysis of hypsochromic shifts and reduction of absorption spectra by increasing guest concentration. The  $y$ -axis is  $\Delta A$  and the  $x$ -axis is  $[G]$ . The binding constants  $K_{\text{guest}}$  were calculated from eq(1) using non-linear curve fitting ( $A$ : absorbance,  $b$ : optical path length,  $\varepsilon$ : molar extinction coefficient,  $\Delta\varepsilon = \varepsilon(100/0) - \varepsilon(1/99)$ ).  $A(x/y)$  or  $\varepsilon(x/y)$  means a value of an absorbance or a molar extinction coefficient of a sample in toluene/ligands =  $x/y$  v/v, respectively. Since isosbestic points were observed with most bidentate ligands, especially for pairs with large binding constants,  $K$  was calculated assuming that the binding of the amine to the tin center is the rate-determining step in the reaction.

$$\Delta A = (b\Delta\varepsilon/2K_{\text{guest}})[1 + K_{\text{a,guest}}[G] + K_{\text{guest}}[H_0] - \{(1 + K_{\text{guest}}[H_0] + K_{\text{guest}}[G])^2 - 4K_{\text{guest}}^2[G][H_0]\}^{1/2}] \quad (1)$$

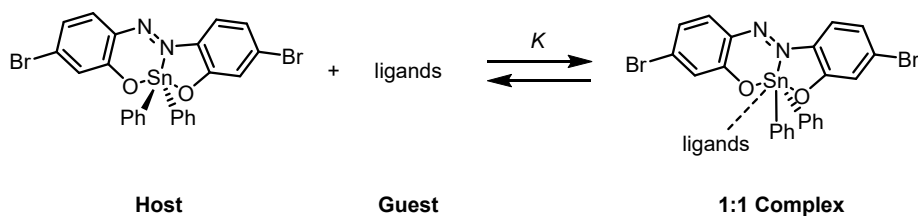

**Scheme S1.** Equilibrium reaction between host **TAz** and guest ligands.

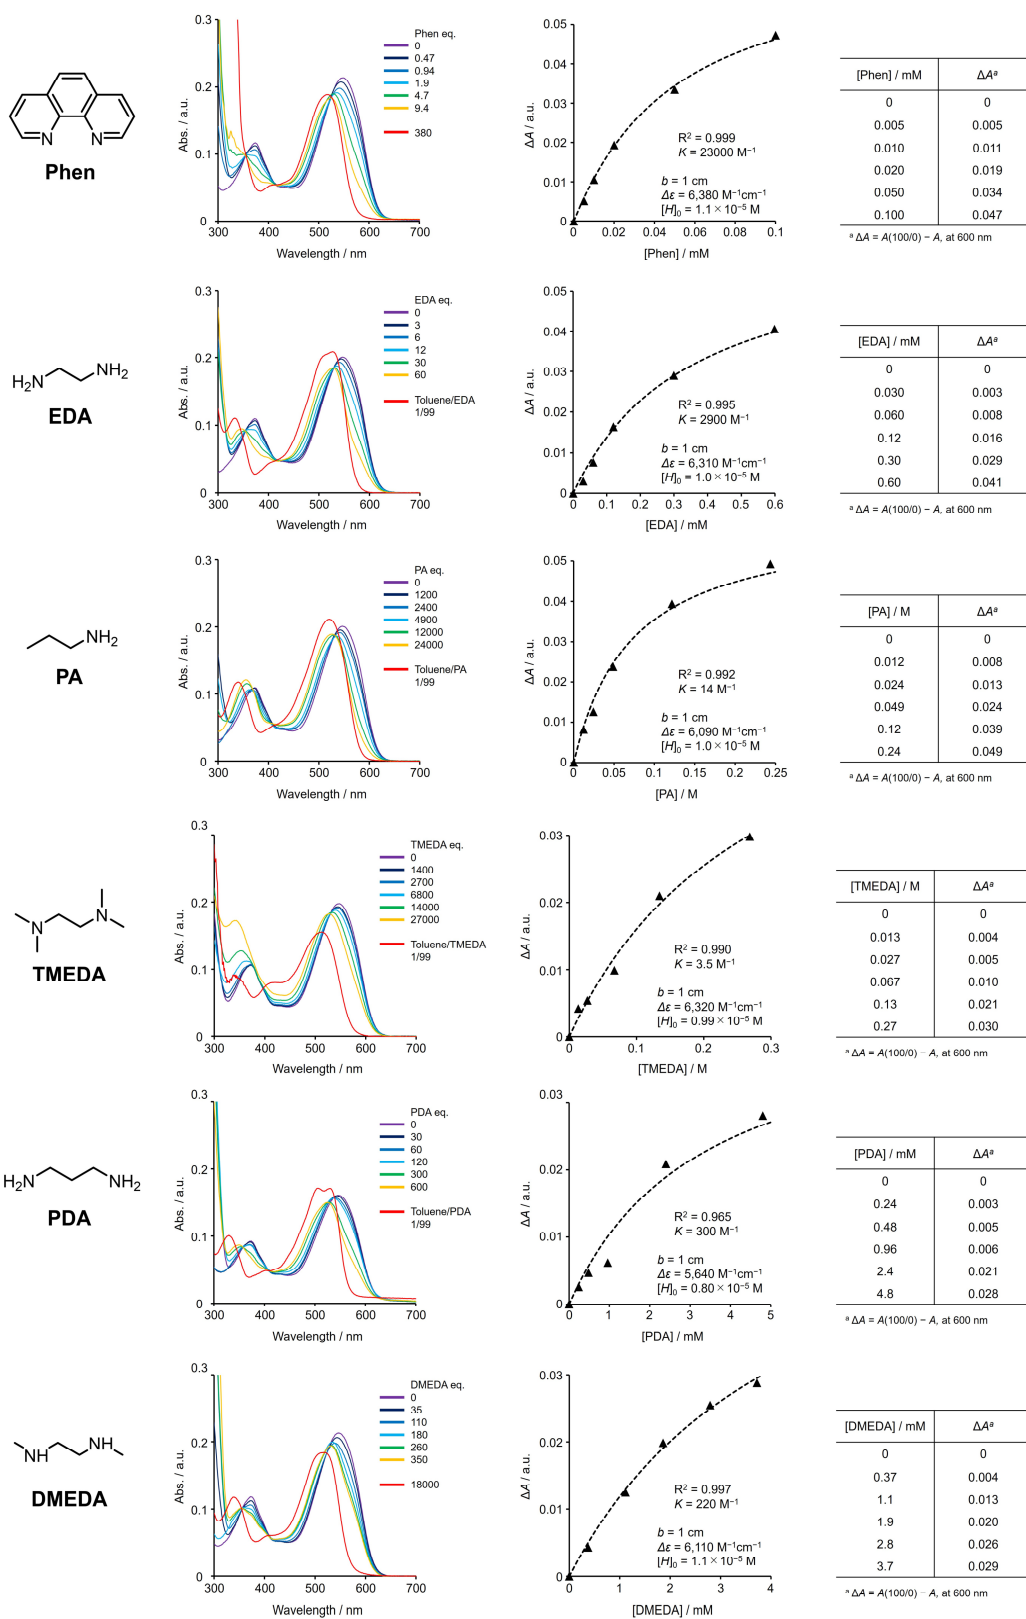

**Figure S5.** UV-vis absorption titration spectra, non-linear curve fitting graphs, and parameters of TAz with ligands in toluene at room temperature.



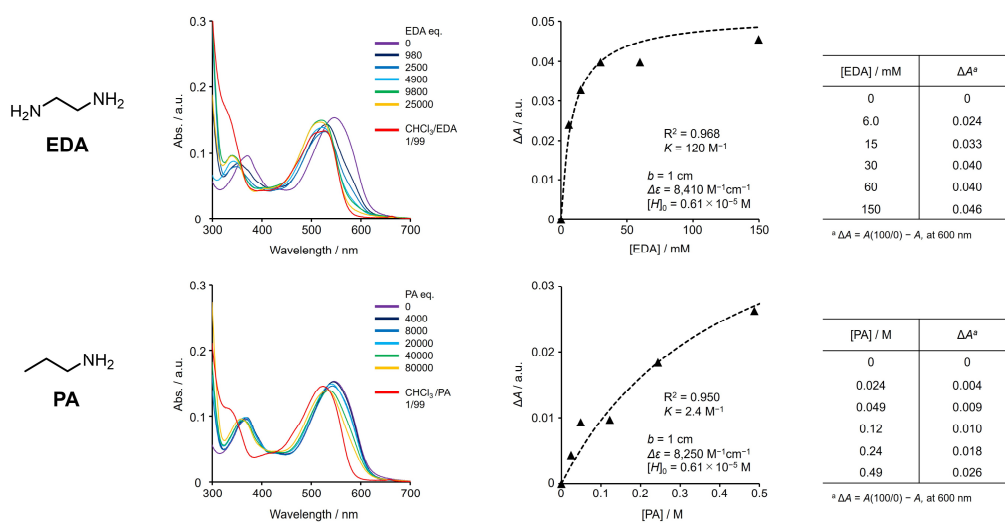

**Figure S6.** UV-vis absorption titration spectra, non-linear curve fitting graphs, and parameters of **Taz** with ligands in  $\text{CHCl}_3$  at room temperature.

### Computational details for theoretical calculation

The Gaussian 16 program package<sup>8</sup> was used for computation of single molecules. We optimized the structures of **TAz**, **TAz-PA**, **TAz-EDA**, **TAz-Phen**, **M-TAz**, **M-TAz-PA**, **M-TAz-EDA**, **M-TAz-Phen** in the ground state ( $S_0$ ) and calculated their molecular orbitals. The density functional theory (DFT) was applied for the optimization in the  $S_0$  at an LanL2DZ level for Sn and an B3LYP/6-311G(d,p) level for the other elements. We calculated energy of the  $S_0 \rightarrow S_1$  and  $S_0 \rightarrow S_2$  transition with optimized geometries in the  $S_0$  states by time-dependent (TD-) DFT at an B3LYP/6-311G(d,p) level. Natural bond orbital (NBO) calculation was carried out by DFT at an B3LYP/6-311G(d,p).

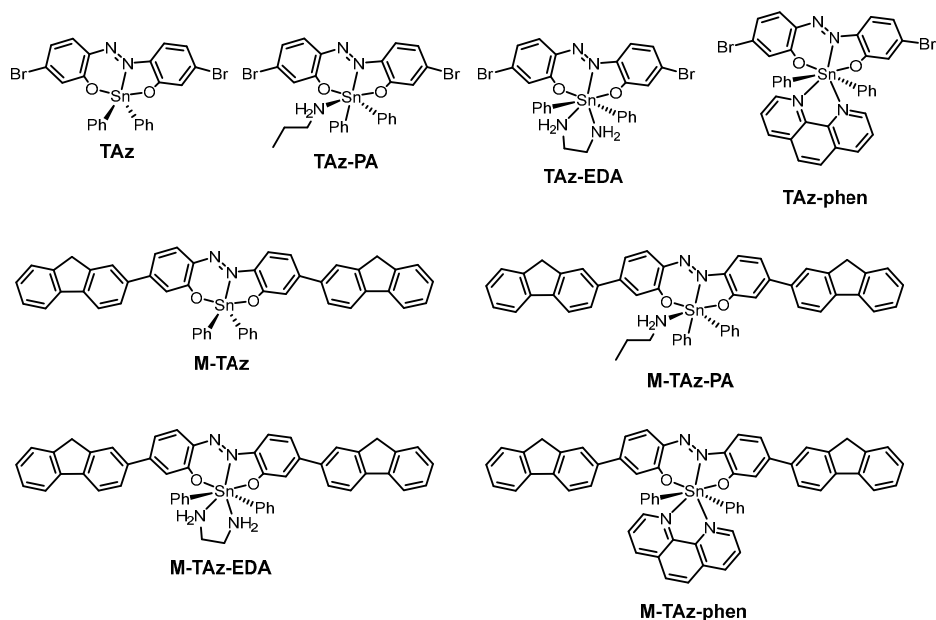

**Table S4.** Results of the  $S_0 \rightarrow S_1$  transition of TAz compounds from TD-DFT calculations

|            | Transition            | Energy gap<br>/ eV | Wavelength<br>/ nm | Oscillator<br>Strength | Assignment (Weight)                  |
|------------|-----------------------|--------------------|--------------------|------------------------|--------------------------------------|
| TAz        | $S_0 \rightarrow S_1$ | 2.4739             | 501.17             | 0.4048                 | HOMO $\rightarrow$ LUMO (0.69160)    |
|            |                       |                    |                    |                        | HOMO-2 $\rightarrow$ LUMO (0.13029)  |
| TAz-PA     | $S_0 \rightarrow S_1$ | 2.6004             | 476.79             | 0.3946                 | HOMO $\rightarrow$ LUMO (0.69268)    |
| TAz-EDA    | $S_0 \rightarrow S_1$ | 2.6044             | 476.06             | 0.4088                 | HOMO $\rightarrow$ LUMO (0.69694)    |
| TAz-Phen   | $S_0 \rightarrow S_1$ | 2.5309             | 489.89             | 0.0073                 | HOMO $\rightarrow$ LUMO (0.36133)    |
|            |                       |                    |                    |                        | HOMO $\rightarrow$ LUMO+1 (0.60413)  |
|            |                       |                    |                    |                        | $S_0 \rightarrow S_2$                |
|            |                       |                    |                    |                        | HOMO $\rightarrow$ LUMO+1 (-0.35845) |
|            |                       |                    |                    |                        | HOMO $\rightarrow$ LUMO+2 (-0.18336) |
| M-TAz      | $S_0 \rightarrow S_1$ | 2.2655             | 547.27             | 1.2620                 | HOMO $\rightarrow$ LUMO (0.70020)    |
| M-TAz-PA   | $S_0 \rightarrow S_1$ | 2.3835             | 520.19             | 1.2420                 | HOMO $\rightarrow$ LUMO (0.69848)    |
| M-TAz-EDA  | $S_0 \rightarrow S_1$ | 2.3922             | 518.29             | 1.1089                 | HOMO $\rightarrow$ LUMO (0.70013)    |
| M-TAz-Phen | $S_0 \rightarrow S_1$ | 2.3661             | 523.99             | 0.1325                 | HOMO $\rightarrow$ LUMO (0.35217)    |
|            |                       |                    |                    |                        | HOMO $\rightarrow$ LUMO+1 (0.60514)  |
|            |                       |                    |                    |                        | $S_0 \rightarrow S_2$                |
|            |                       |                    |                    |                        | HOMO $\rightarrow$ LUMO+1 (-0.35809) |

TAz-phen

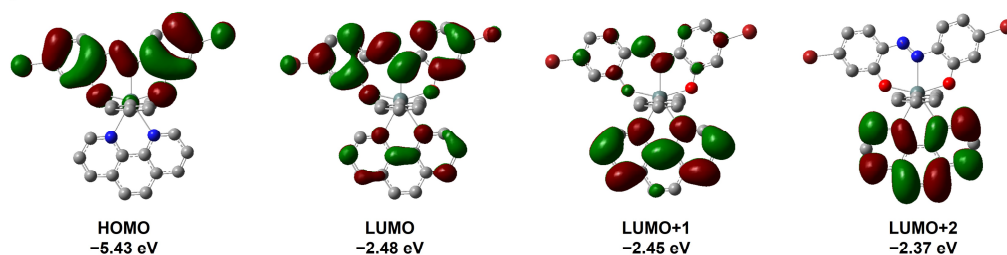

M-TAz-phen

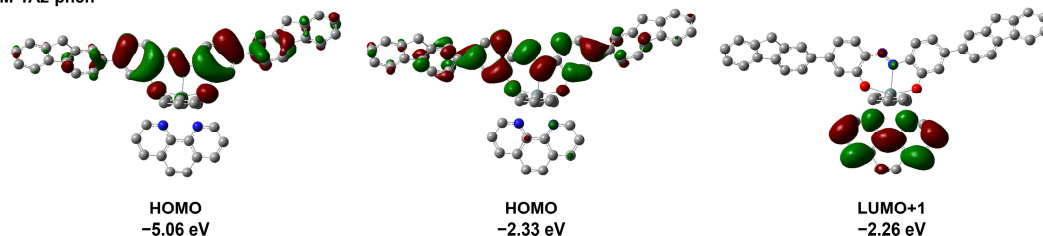**Figure S7.** Selected MOs of **TAz-phen** and **M-TAz-phen** obtained with DFT calculations (isovalue = 0.02). Hydrogen atoms are omitted for clarity.

## NBO calculation

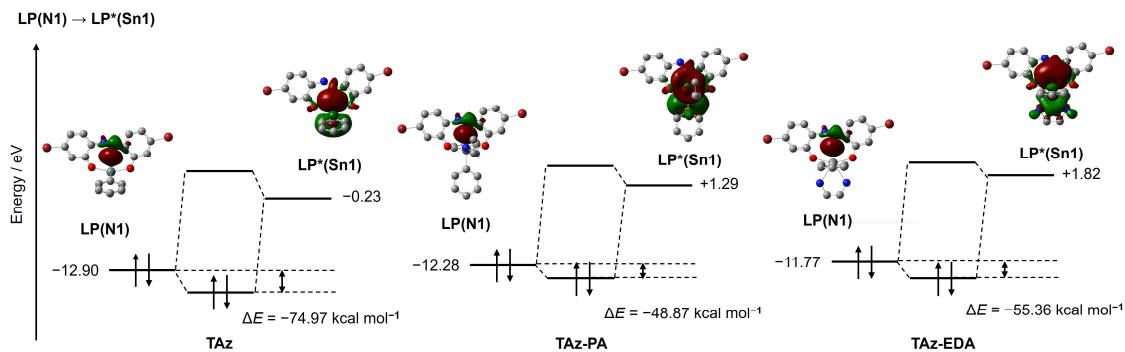

**Figure S8.** The results of the NBO calculations of the **TAz** complexes focused on the free energy of the donor–acceptor interactions of LP(N1)→LP\*(Sn1). The figure shows representative energy diagrams and NBOs of **TAz** (isovalue = 0.02).  $\Delta E$ : The second-order perturbation stabilization energy. Hydrogen atoms are omitted for clarity.

## LP(O1) and LP(O2)

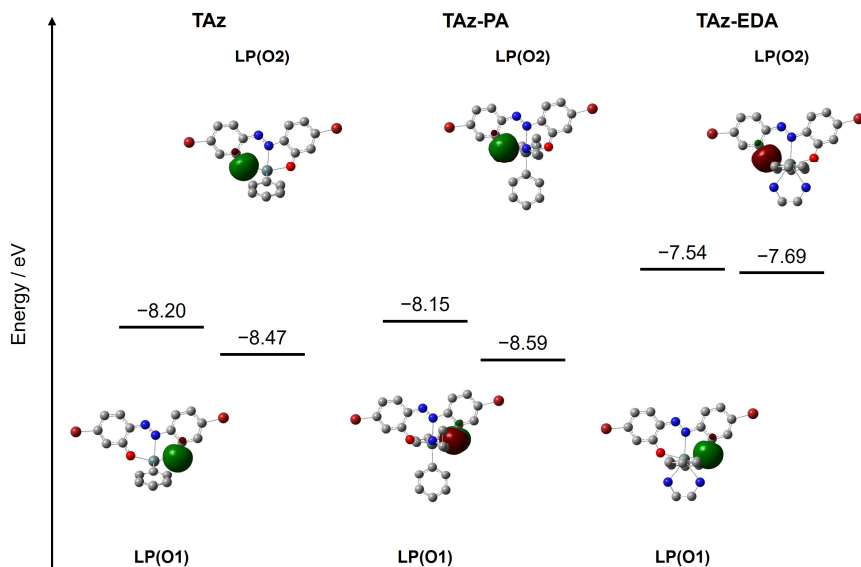

**Figure S9.** The results of NBO calculations of the **TAz** focused on the energy levels of LP(O1) and LP(O2). The figure shows representative energy diagrams and NBOs of **TAz**, **TAz-PA** and **TAz-EDA** (isovalue = 0.02). Hydrogen atoms are omitted for clarity.

## Detailed information on vapochromism

### Exposure Process

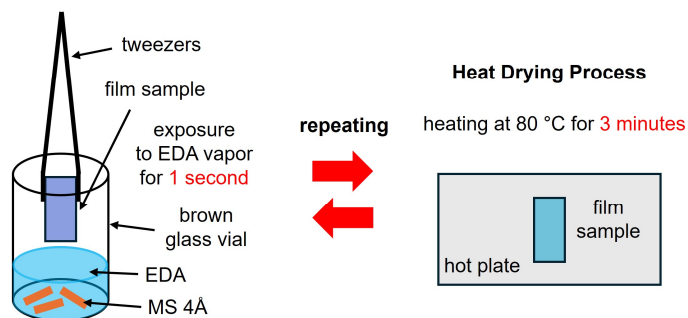

**Figure S10.** Illustration of the exposure to EDA vapor and the heat drying process. All processes were performed under atmospheric conditions. The molecular sieve (MS 4Å) was used for dehydration of EDA. New EDA was used each time to prevent EDA degradation due to moisture.

**Table S5.** Spectroscopic data of vapochromism with the **P-TAz** film and EDA vapor.

| Number of cycles             | $\lambda_{\text{abs}} / \text{nm}$ | $\lambda_{\text{PL}}^a / \text{nm}$ | $\Phi_{\text{PL}}^{a,b} / \%$ |
|------------------------------|------------------------------------|-------------------------------------|-------------------------------|
| Initial                      | 643                                | 702                                 | 2.1                           |
| 1 <sup>st</sup> EDA exposure | 600                                | 696                                 | 0.3                           |
| 1 <sup>st</sup> heat dry     | 642                                | 701                                 | 1.7                           |
| 2 <sup>nd</sup> EDA exposure | 598                                | 696                                 | 0.3                           |
| 2 <sup>nd</sup> heat dry     | 641                                | 702                                 | 1.6                           |
| 3 <sup>rd</sup> EDA exposure | 598                                | 697                                 | 0.3                           |
| 3 <sup>rd</sup> heat dry     | 641                                | 701                                 | 1.4                           |
| 4 <sup>th</sup> EDA exposure | 598                                | 699                                 | 0.2                           |
| 4 <sup>th</sup> heat dry     | 640                                | 702                                 | 1.5                           |
| 5 <sup>th</sup> EDA exposure | 598                                | 694                                 | 0.3                           |
| 5 <sup>th</sup> heat dry     | 639                                | 700                                 | 1.6                           |

<sup>a</sup> Excited at  $\lambda_{\text{abs}}$ .

<sup>b</sup> Absolute PL quantum yield.

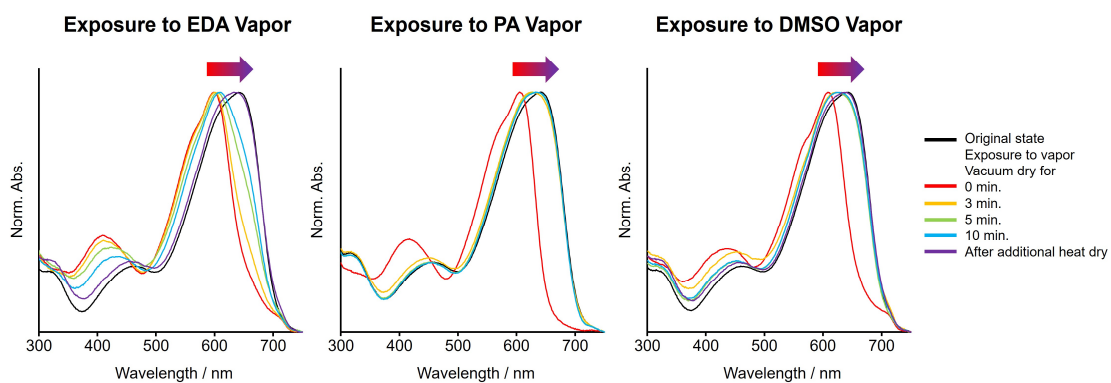

**Figure S11.** Time dependency of recovery behavior. After exposure to each vapor (EDA, PA and DMSO), the films were vacuum dried at room temperature and UV-vis absorption spectra were measured after certain time (3, 5, and 10 min.). Additional drying procedures (100 °C for 3 min) were performed for films after exposure to EDA and DMSO vapor.

## Detailed information on thermochromism

**Table S6.** Spectroscopic data of thermochromism with the **P-TAz** and phen film.

| Temp.  | $\lambda_{\text{abs}}$ / nm | $\lambda_{\text{PL}}^a$ / nm |
|--------|-----------------------------|------------------------------|
| 30 °C  | 587                         | 651                          |
| 60 °C  | 587                         | 655                          |
| 90 °C  | 587                         | 669                          |
| 120 °C | 607                         | 707                          |
| 150 °C | 617                         | 727                          |

<sup>a</sup> Excited at 593 nm.

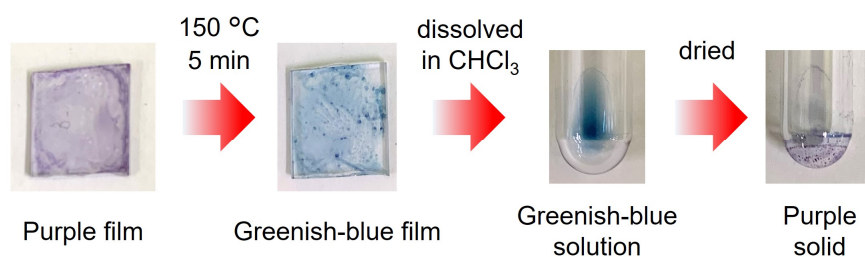

**Figure S12.** Changes in the film appearance by consecutive heating, dissolution in  $\text{CHCl}_3$ , and drying. Finally, the purple solid was recovered after the heating process causing color change.

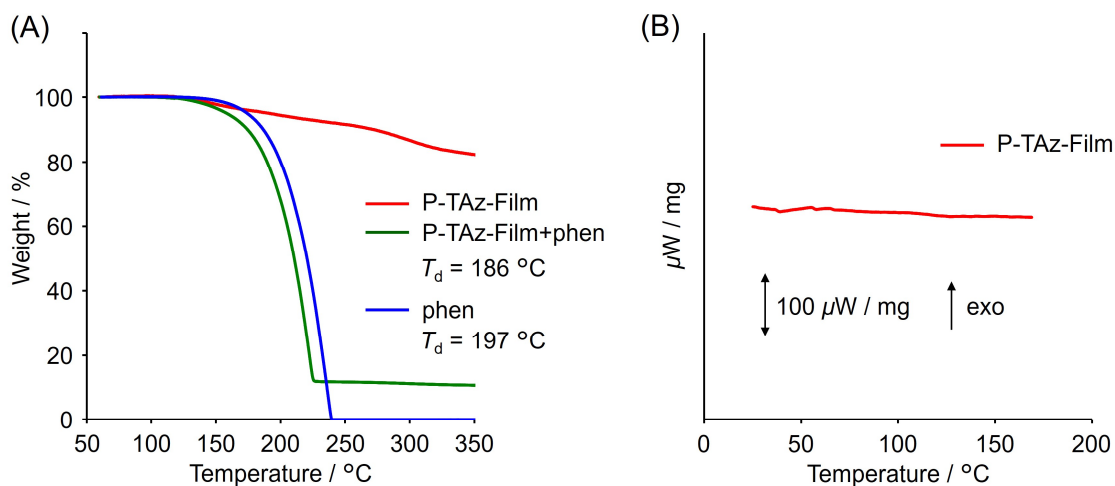

**Figure S13.** (A) Thermogravimetric analysis (TGA) of **P-TAz** in film, **P-TAz**/phen (1/8 w/w) in film, and phen under air (scan rate, 2 °C min<sup>-1</sup>).  $T_d$ : Onset temperature of the degradation curve calculated from an extrapolation method. (B) The first scan of the differential scanning calorimetry (DSC) curve of **P-TAz** in film (scan rate, 2 °C min<sup>-1</sup>) under  $\text{N}_2$ . All of the films were prepared by a drop-casting method from  $\text{CHCl}_3$  solution at 60 °C.

## References

1. T. Higashi, ABSCOR. Program for Absorption Correction.; Rigaku Corporation: Japan, **1995**.
2. K. Wakita, Yadokari&XG. Program for Crystal Structure Analysis.; **2000**.
3. L. J. Farrugia, *J. Appl. Cryst.*, 1997, **30**, 565.
4. M. Gon, Y. Morisaki, K. Tanimura, K. Tanaka and Y. Chujo, *Mater. Chem. Front.*, 2023, **7**, 1345–1353.
5. G. M. Sheldrick, *Acta Cryst.*, 2015, **C71**, 3–8.
6. M. Gon, K. Tanaka and Y. Chujo, *Chem. Eur. J.*, 2021, **27**, 7561–7571.
7. A. L. Spek, *Acta Cryst.*, 2015, **C71**, 9–18.
8. Gaussian 16, Revision C.01, M. J. Frisch, G. W. Trucks, H. B. Schlegel, G. E. Scuseria, M. A. Robb, J. R. Cheeseman, G. Scalmani, V. Barone, G. A. Petersson, H. Nakatsuji, X. Li, M. Caricato, A. V. Marenich, J. Bloino, B. G. Janesko, R. Gomperts, B. Mennucci, H. P. Hratchian, J. V. Ortiz, A. F. Izmaylov, J. L. Sonnenberg, D. Williams-Young, F. Ding, F. Lipparini, F. Egidi, J. Goings, B. Peng, A. Petrone, T. Henderson, D. Ranasinghe, V. G. Zakrzewski, J. Gao, N. Rega, G. Zheng, W. Liang, M. Hada, M. Ehara, K. Toyota, R. Fukuda, J. Hasegawa, M. Ishida, T. Nakajima, Y. Honda, O. Kitao, H. Nakai, T. Vreven, K. Throssell, J. A. Montgomery, Jr., J. E. Peralta, F. Ogliaro, M. J. Bearpark, J. J. Heyd, E. N. Brothers, K. N. Kudin, V. N. Staroverov, T. A. Keith, R. Kobayashi, J. Normand, K. Raghavachari, A. P. Rendell, J. C. Burant, S. S. Iyengar, J. Tomasi, M. Cossi, J. M. Millam, M. Klene, C. Adamo, R. Cammi, J. W. Ochterski, R. L. Martin, K. Morokuma, O. Farkas, J. B. Foresman, and D. J. Fox, Gaussian, Inc., Wallingford CT, **2016**.



Coordinates for optimized structures with theoretical calculation

Taz

| Center Number | Atomic Number | Atom | Coordinates (Angstroms) |           |           |
|---------------|---------------|------|-------------------------|-----------|-----------|
|               |               |      | X                       | Y         | Z         |
| 1             | 50            | Sn   | -0.105809               | 1.177153  | -0.000029 |
| 2             | 7             | N    | 0.395384                | -2.024487 | 0.000101  |
| 3             | 6             | C    | 1.752901                | -1.852813 | 0.000084  |
| 4             | 6             | C    | 2.483158                | -3.068255 | 0.00013   |
| 5             | 6             | C    | 2.466988                | -0.609363 | 0.000027  |
| 6             | 6             | C    | 3.85668                 | -3.096644 | 0.000122  |
| 7             | 1             | H    | 1.907429                | -3.985638 | 0.000173  |
| 8             | 6             | C    | 3.879609                | -0.655607 | 0.000018  |
| 9             | 6             | C    | 4.538674                | -1.866626 | 0.000065  |
| 10            | 1             | H    | 4.401399                | -4.030013 | 0.000159  |
| 11            | 1             | H    | 4.416468                | 0.283163  | -0.000026 |
| 12            | 6             | C    | -1.795058               | -1.370821 | 0.000083  |
| 13            | 6             | C    | -2.667341               | -0.250384 | 0.000057  |
| 14            | 6             | C    | -2.304348               | -2.675663 | 0.000113  |
| 15            | 6             | C    | -4.055945               | -0.480309 | 0.000063  |
| 16            | 6             | C    | -3.669242               | -2.891402 | 0.000117  |
| 17            | 1             | H    | -1.610336               | -3.505165 | 0.000132  |
| 18            | 6             | C    | -4.525709               | -1.779827 | 0.000091  |
| 19            | 1             | H    | -4.723912               | 0.369802  | 0.000044  |
| 20            | 1             | H    | -4.07278                | -3.894291 | 0.000139  |
| 21            | 7             | N    | -0.427732               | -1.049709 | 0.000069  |
| 22            | 8             | O    | 1.877768                | 0.554558  | -0.000015 |
| 23            | 8             | O    | -2.17655                | 0.97247   | 0.000028  |
| 24            | 35            | Br   | -6.418143               | -2.082428 | 0.000094  |
| 25            | 35            | Br   | 6.451268                | -1.882809 | 0.000051  |
| 26            | 6             | C    | 0.009708                | 2.110429  | -1.901916 |
| 27            | 6             | C    | 1.2474                  | 2.329473  | -2.520602 |
| 28            | 6             | C    | -1.159127               | 2.536592  | -2.547081 |
| 29            | 6             | C    | 1.314318                | 2.96152   | -3.760758 |
| 30            | 1             | H    | 2.159145                | 2.002498  | -2.034587 |
| 31            | 6             | C    | -1.089153               | 3.167799  | -3.787665 |
| 32            | 1             | H    | -2.12298                | 2.370206  | -2.08054  |
| 33            | 6             | C    | 0.146567                | 3.380743  | -4.395004 |
| 34            | 1             | H    | 2.277608                | 3.124783  | -4.231547 |
| 35            | 1             | H    | -1.999865               | 3.491451  | -4.27962  |
| 36            | 1             | H    | 0.199608                | 3.87159   | -5.36058  |
| 37            | 6             | C    | 0.009767                | 2.110676  | 1.901732  |
| 38            | 6             | C    | 1.247471                | 2.32977   | 2.520376  |
| 39            | 6             | C    | -1.15905                | 2.536963  | 2.546849  |

|    |   |   |           |          |          |
|----|---|---|-----------|----------|----------|
| 40 | 6 | C | 1.314419  | 2.961988 | 3.760443 |
| 41 | 1 | H | 2.159202  | 2.0027   | 2.034397 |
| 42 | 6 | C | -1.089046 | 3.168341 | 3.787344 |
| 43 | 1 | H | -2.122911 | 2.370538 | 2.080339 |
| 44 | 6 | C | 0.146686  | 3.381334 | 4.394642 |
| 45 | 1 | H | 2.277718  | 3.125289 | 4.2312   |
| 46 | 1 | H | -1.999744 | 3.492089 | 4.279262 |
| 47 | 1 | H | 0.199751  | 3.872314 | 5.360148 |

#### TAz-PA

| Center Number | Atomic Number | Atom | Coordinates (Angstroms) |           |           |
|---------------|---------------|------|-------------------------|-----------|-----------|
|               |               |      | X                       | Y         | Z         |
| 1             | 50            | Sn   | 0.001321                | 1.03334   | 0.346997  |
| 2             | 35            | Br   | 6.404577                | -2.034358 | -0.040159 |
| 3             | 35            | Br   | -6.467116               | -1.875664 | -0.742492 |
| 4             | 8             | O    | -1.869058               | 0.475705  | -0.352186 |
| 5             | 8             | O    | 2.065284                | 0.845015  | 0.33754   |
| 6             | 6             | C    | -0.322401               | 0.582482  | 2.430439  |
| 7             | 6             | C    | -2.465338               | -0.695202 | -0.380027 |
| 8             | 6             | C    | -4.559897               | -1.910639 | -0.570731 |
| 9             | 6             | C    | -3.870738               | -0.71572  | -0.516964 |
| 10            | 1             | H    | -4.383233               | 0.23526   | -0.568571 |
| 11            | 6             | C    | -0.189766               | 3.145649  | 0.043167  |
| 12            | 6             | C    | -3.911746               | -3.151919 | -0.504895 |
| 13            | 1             | H    | -4.472449               | -4.074766 | -0.549005 |
| 14            | 6             | C    | 4.501119                | -1.800753 | -0.055047 |
| 15            | 6             | C    | 3.981769                | -0.535585 | 0.14441   |
| 16            | 1             | H    | 4.61686                 | 0.322653  | 0.315418  |
| 17            | 6             | C    | -2.539652               | -3.149748 | -0.389371 |
| 18            | 1             | H    | -1.986311               | -4.079955 | -0.345954 |
| 19            | 6             | C    | 3.689997                | -2.925275 | -0.268978 |
| 20            | 1             | H    | 4.132333                | -3.90029  | -0.418931 |
| 21            | 6             | C    | -1.783333               | -1.957157 | -0.320793 |
| 22            | 6             | C    | 2.584795                | -0.350753 | 0.139233  |
| 23            | 6             | C    | 2.318529                | -2.755571 | -0.283382 |
| 24            | 1             | H    | 1.654725                | -3.594632 | -0.445788 |
| 25            | 6             | C    | 1.756635                | -1.486908 | -0.086192 |
| 26            | 7             | N    | -0.420324               | -2.178816 | -0.249182 |
| 27            | 7             | N    | 0.384625                | -1.208017 | -0.105358 |
| 28            | 6             | C    | -1.40012                | 3.710686  | -0.381602 |
| 29            | 6             | C    | 0.889079                | 4.000945  | 0.308972  |
| 30            | 6             | C    | 0.763784                | 5.380518  | 0.146671  |
| 31            | 6             | C    | -1.526702               | 5.090456  | -0.544654 |
| 32            | 6             | C    | -0.444403               | 5.927244  | -0.28154  |
| 33            | 1             | H    | 1.837862                | 3.590393  | 0.639221  |

|    |   |   |           |           |           |
|----|---|---|-----------|-----------|-----------|
| 34 | 1 | H | 1.60873   | 6.027772  | 0.356661  |
| 35 | 1 | H | -2.253383 | 3.070878  | -0.581878 |
| 36 | 1 | H | -2.471556 | 5.511378  | -0.87212  |
| 37 | 1 | H | -0.542875 | 7.00017   | -0.405326 |
| 38 | 6 | C | 0.754025  | 0.393296  | 3.308636  |
| 39 | 6 | C | -1.621644 | 0.509326  | 2.952357  |
| 40 | 6 | C | -1.839959 | 0.247774  | 4.304558  |
| 41 | 6 | C | 0.539516  | 0.131406  | 4.661312  |
| 42 | 6 | C | -0.758591 | 0.056572  | 5.161542  |
| 43 | 1 | H | -2.478274 | 0.657361  | 2.303006  |
| 44 | 1 | H | -2.853652 | 0.193124  | 4.687355  |
| 45 | 1 | H | 1.77204   | 0.45426   | 2.939086  |
| 46 | 1 | H | 1.386284  | -0.013153 | 5.32409   |
| 47 | 1 | H | -0.926436 | -0.14744  | 6.213488  |
| 48 | 1 | H | -0.604949 | 1.31135   | -2.405488 |
| 49 | 1 | H | 0.354415  | -0.000993 | -2.390457 |
| 50 | 6 | C | 1.390816  | 1.755959  | -2.728972 |
| 51 | 1 | H | 2.336874  | 1.344613  | -2.369985 |
| 52 | 1 | H | 1.317472  | 2.772301  | -2.338955 |
| 53 | 6 | C | 1.358382  | 1.772663  | -4.260851 |
| 54 | 1 | H | 2.139571  | 2.461868  | -4.599621 |
| 55 | 1 | H | 0.407274  | 2.203567  | -4.597185 |
| 56 | 6 | C | 1.572237  | 0.403304  | -4.913877 |
| 57 | 1 | H | 1.591924  | 0.488042  | -6.002899 |
| 58 | 1 | H | 2.521096  | -0.040829 | -4.597841 |
| 59 | 1 | H | 0.773318  | -0.302027 | -4.664448 |
| 60 | 7 | N | 0.303833  | 0.970947  | -2.094641 |

#### TAz-EDA

| Center Number | Atomic Number | Atom | Coordinates (Angstroms) |           |           |
|---------------|---------------|------|-------------------------|-----------|-----------|
|               |               |      | X                       | Y         | Z         |
| 1             | 50            | Sn   | -0.090464               | 1.175017  | 0.005141  |
| 2             | 7             | N    | 0.404121                | -2.150029 | -0.011228 |
| 3             | 6             | C    | 1.770499                | -1.970936 | -0.012578 |
| 4             | 6             | C    | 2.492519                | -3.186899 | -0.010937 |
| 5             | 6             | C    | 2.490066                | -0.730415 | -0.01715  |
| 6             | 6             | C    | 3.869014                | -3.234843 | -0.012605 |
| 7             | 1             | H    | 1.907899                | -4.098902 | -0.008114 |
| 8             | 6             | C    | 3.906084                | -0.798657 | -0.019117 |
| 9             | 6             | C    | 4.557612                | -2.013544 | -0.016741 |
| 10            | 1             | H    | 4.402116                | -4.174884 | -0.011022 |
| 11            | 1             | H    | 4.454265                | 0.133972  | -0.022065 |
| 12            | 6             | C    | -1.771449               | -1.504646 | -0.007215 |
| 13            | 6             | C    | -2.66011                | -0.396008 | 0.008441  |
| 14            | 6             | C    | -2.267326               | -2.815129 | -0.021175 |

|    |    |    |           |           |           |
|----|----|----|-----------|-----------|-----------|
| 15 | 6  | C  | -4.04786  | -0.654334 | 0.009671  |
| 16 | 6  | G  | -3.628783 | -3.057315 | -0.019774 |
| 17 | 1  | H  | -1.559207 | -3.632711 | -0.033066 |
| 18 | 6  | C  | -4.499318 | -1.959277 | -0.004059 |
| 19 | 1  | H  | -4.730835 | 0.184126  | 0.021563  |
| 20 | 1  | H  | -4.015619 | -4.066799 | -0.030792 |
| 21 | 7  | N  | -0.405305 | -1.171887 | -0.007285 |
| 22 | 8  | O  | 1.929427  | 0.446058  | -0.02112  |
| 23 | 8  | O  | -2.205233 | 0.836672  | 0.022011  |
| 24 | 6  | C  | -0.075008 | 1.379432  | -2.144973 |
| 25 | 6  | C  | 1.120363  | 1.339798  | -2.875579 |
| 26 | 6  | C  | -1.270169 | 1.560865  | -2.856272 |
| 27 | 6  | C  | 1.126082  | 1.494792  | -4.262312 |
| 28 | 1  | H  | 2.058046  | 1.159987  | -2.361594 |
| 29 | 6  | C  | -1.269951 | 1.714437  | -4.243086 |
| 30 | 1  | H  | -2.215157 | 1.556451  | -2.323835 |
| 31 | 6  | C  | -0.069966 | 1.687089  | -4.94978  |
| 32 | 1  | H  | 2.064457  | 1.454353  | -4.805604 |
| 33 | 1  | H  | -2.208722 | 1.845125  | -4.771241 |
| 34 | 1  | H  | -0.0679   | 1.802827  | -6.028095 |
| 35 | 6  | C  | -0.037794 | 1.347982  | 2.157563  |
| 36 | 6  | C  | 1.17284   | 1.302527  | 2.863465  |
| 37 | 6  | C  | -1.218528 | 1.512305  | 2.895431  |
| 38 | 6  | C  | 1.206474  | 1.434919  | 4.25207   |
| 39 | 1  | H  | 2.100807  | 1.137475  | 2.326741  |
| 40 | 6  | C  | -1.190317 | 1.644277  | 4.284257  |
| 41 | 1  | H  | -2.174484 | 1.509805  | 2.383681  |
| 42 | 6  | C  | 0.023671  | 1.611     | 4.966305  |
| 43 | 1  | H  | 2.155866  | 1.389389  | 4.775436  |
| 44 | 1  | H  | -2.118583 | 1.763029  | 4.833392  |
| 45 | 1  | H  | 0.046831  | 1.70962   | 6.046072  |
| 46 | 1  | H  | -1.67952  | 3.471642  | -0.918118 |
| 47 | 1  | H  | -2.076903 | 3.237638  | 0.648009  |
| 48 | 1  | H  | 1.897819  | 3.139776  | 0.95375   |
| 49 | 1  | H  | 2.24136   | 2.869709  | -0.620335 |
| 50 | 6  | C  | -0.467421 | 4.535525  | 0.382061  |
| 51 | 1  | H  | -0.939709 | 5.491333  | 0.128486  |
| 52 | 1  | H  | -0.324587 | 4.515427  | 1.465732  |
| 53 | 6  | C  | 0.886255  | 4.422975  | -0.319983 |
| 54 | 1  | H  | 0.743096  | 4.449204  | -1.403481 |
| 55 | 1  | H  | 1.518229  | 5.276336  | -0.049324 |
| 56 | 7  | N  | -1.294109 | 3.375732  | 0.017358  |
| 57 | 7  | N  | 1.49826   | 3.129446  | 0.019419  |
| 58 | 35 | Br | -6.392989 | -2.287314 | -0.002101 |
| 59 | 35 | Br | 6.477116  | -2.038828 | -0.019149 |

**TAz-phen**

| Center Number | Atomic Number | Atom | Coordinates (Angstroms) |          |          |
|---------------|---------------|------|-------------------------|----------|----------|
|               |               |      | X                       | Y        | Z        |
| 1             | 50            | Sn   | -0.11742                | 0.34168  | 0.00926  |
| 2             | 6             | C    | 0.07819                 | 0.56381  | -2.11519 |
| 3             | 6             | C    | -1.05708                | 0.7119   | -2.92186 |
| 4             | 6             | C    | 1.33157                 | 0.5253   | -2.73773 |
| 5             | 6             | C    | -0.94247                | 0.82802  | -4.30683 |
| 6             | 1             | H    | -2.04024                | 0.72549  | -2.46795 |
| 7             | 6             | C    | 1.44961                 | 0.64325  | -4.12217 |
| 8             | 1             | H    | 2.22589                 | 0.3905   | -2.14214 |
| 9             | 6             | C    | 0.31205                 | 0.7974   | -4.91082 |
| 10            | 1             | H    | -1.83543                | 0.93743  | -4.91341 |
| 11            | 1             | H    | 2.4309                  | 0.60823  | -4.58381 |
| 12            | 1             | H    | 0.40215                 | 0.88549  | -5.98814 |
| 13            | 6             | C    | -0.20172                | 0.60349  | 2.13668  |
| 14            | 6             | C    | -1.41182                | 0.91422  | 2.76914  |
| 15            | 6             | C    | 0.93697                 | 0.43452  | 2.93363  |
| 16            | 6             | C    | -1.48003                | 1.06299  | 4.15405  |
| 17            | 1             | H    | -2.31299                | 1.02706  | 2.17959  |
| 18            | 6             | C    | 0.8721                  | 0.58331  | 4.31863  |
| 19            | 1             | H    | 1.88167                 | 0.17365  | 2.47318  |
| 20            | 6             | C    | -0.33689                | 0.90107  | 4.93278  |
| 21            | 1             | H    | -2.42898                | 1.29985  | 4.62381  |
| 22            | 1             | H    | 1.76636                 | 0.44479  | 4.91734  |
| 23            | 1             | H    | -0.38928                | 1.01385  | 6.0103   |
| 24            | 6             | C    | 1.57975                 | -2.91521 | 0        |
| 25            | 6             | C    | 2.24224                 | -4.16244 | -0.05879 |
| 26            | 6             | C    | 2.35283                 | -1.71147 | 0.07515  |
| 27            | 6             | C    | 3.61508                 | -4.2752  | -0.05311 |
| 28            | 1             | H    | 1.61494                 | -5.0441  | -0.1109  |
| 29            | 6             | C    | 3.76427                 | -1.84665 | 0.08331  |
| 30            | 6             | C    | 4.35856                 | -3.08929 | 0.01943  |
| 31            | 1             | H    | 4.10414                 | -5.23767 | -0.10113 |
| 32            | 1             | H    | 4.36279                 | -0.94758 | 0.13948  |
| 33            | 8             | O    | 1.83899                 | -0.51647 | 0.14687  |
| 34            | 6             | C    | -1.92794                | -2.27131 | -0.00673 |
| 35            | 6             | C    | -2.75603                | -1.12093 | -0.06397 |
| 36            | 6             | C    | -2.49004                | -3.55361 | 0.04022  |
| 37            | 6             | C    | -4.15506                | -1.30542 | -0.07233 |
| 38            | 6             | C    | -3.8624                 | -3.72508 | 0.03105  |
| 39            | 1             | H    | -1.82525                | -4.40568 | 0.08451  |
| 40            | 6             | C    | -4.67406                | -2.58468 | -0.02612 |
| 41            | 1             | H    | -4.79702                | -0.43623 | -0.11573 |
| 42            | 1             | H    | -4.30134                | -4.71234 | 0.06929  |
| 43            | 8             | O    | -2.23186                | 0.08283  | -0.11373 |

|    |    |    |          |          |          |
|----|----|----|----------|----------|----------|
| 44 | 7  | N  | -0.54838 | -2.00391 | -0.00072 |
| 45 | 7  | N  | 0.20728  | -3.02369 | -0.012   |
| 46 | 6  | C  | 1.06633  | 3.68026  | 0.05834  |
| 47 | 6  | C  | 2.86133  | 2.25082  | 0.26393  |
| 48 | 6  | C  | -0.36207 | 3.86971  | -0.07769 |
| 49 | 6  | C  | 1.91116  | 4.81993  | 0.11476  |
| 50 | 6  | C  | 3.77384  | 3.31587  | 0.3329   |
| 51 | 1  | H  | 3.18614  | 1.22011  | 0.31645  |
| 52 | 6  | C  | -0.87721 | 5.18993  | -0.16057 |
| 53 | 6  | C  | 1.34965  | 6.13482  | 0.02875  |
| 54 | 6  | C  | 3.29649  | 4.60307  | 0.25578  |
| 55 | 1  | H  | 4.83105  | 3.10952  | 0.44332  |
| 56 | 6  | C  | -2.2718  | 5.34229  | -0.29472 |
| 57 | 6  | C  | 0.01104  | 6.31227  | -0.10497 |
| 58 | 6  | C  | -2.47254 | 2.95779  | -0.24626 |
| 59 | 1  | H  | 2.01944  | 6.98645  | 0.07272  |
| 60 | 1  | H  | 3.96764  | 5.45393  | 0.3024   |
| 61 | 6  | C  | -3.0715  | 4.22475  | -0.33849 |
| 62 | 1  | H  | -2.69563 | 6.33858  | -0.36128 |
| 63 | 1  | H  | -0.41137 | 7.30882  | -0.17069 |
| 64 | 1  | H  | -3.05805 | 2.04768  | -0.27312 |
| 65 | 1  | H  | -4.1467  | 4.30163  | -0.44096 |
| 66 | 7  | N  | 1.55364  | 2.42002  | 0.12931  |
| 67 | 7  | N  | -1.16396 | 2.78058  | -0.11958 |
| 68 | 35 | Br | -6.58225 | -2.81316 | -0.03846 |
| 69 | 35 | Br | 6.27507  | -3.20319 | 0.03127  |

#### M-TAz

| Center Number | Atomic Number | Atom | Coordinates (Angstroms) |           |           |
|---------------|---------------|------|-------------------------|-----------|-----------|
|               |               |      | X                       | Y         | Z         |
| 1             | 50            | Sn   | 0.064769                | 1.93778   | 0.236796  |
| 2             | 7             | N    | -0.326804               | -1.207378 | -0.392169 |
| 3             | 6             | C    | -1.686767               | -1.081798 | -0.368142 |
| 4             | 6             | C    | -2.382539               | -2.297754 | -0.594366 |
| 5             | 6             | C    | -2.446716               | 0.114046  | -0.148462 |
| 6             | 6             | C    | -3.752075               | -2.358995 | -0.604444 |
| 7             | 1             | H    | -1.778281               | -3.179425 | -0.771006 |
| 8             | 6             | C    | -3.851357               | 0.018594  | -0.168768 |
| 9             | 6             | C    | -4.517329               | -1.183059 | -0.390183 |
| 10            | 1             | H    | -4.250857               | -3.297005 | -0.810853 |
| 11            | 1             | H    | -4.402224               | 0.929261  | 0.031501  |
| 12            | 6             | C    | 1.841214                | -0.487518 | -0.254643 |
| 13            | 6             | C    | 2.676157                | 0.637528  | -0.026325 |
| 14            | 6             | C    | 2.402527                | -1.746198 | -0.509987 |
| 15            | 6             | C    | 4.066881                | 0.456948  | -0.058812 |

|    |   |   |            |           |           |
|----|---|---|------------|-----------|-----------|
| 16 | 6 | C | 3.773173   | -1.897893 | -0.536345 |
| 17 | 1 | H | 1.740412   | -2.581525 | -0.693997 |
| 18 | 6 | C | 4.630152   | -0.793548 | -0.310432 |
| 19 | 1 | H | 4.688613   | 1.318598  | 0.149417  |
| 20 | 1 | H | 4.198678   | -2.866713 | -0.765723 |
| 21 | 7 | N | 0.465359   | -0.22208  | -0.200611 |
| 22 | 8 | O | -1.894498  | 1.279824  | 0.076829  |
| 23 | 8 | O | 2.138209   | 1.819853  | 0.22108   |
| 24 | 6 | O | -0.098426  | 2.474175  | 2.285741  |
| 25 | 6 | C | -1.347905  | 2.528359  | 2.916979  |
| 26 | 6 | C | 1.049274   | 2.798531  | 3.02164   |
| 27 | 6 | C | -1.447467  | 2.899101  | 4.256759  |
| 28 | 1 | H | -2.243223  | 2.275985  | 2.360737  |
| 29 | 6 | C | 0.947427   | 3.168367  | 4.361648  |
| 30 | 1 | H | 2.021993   | 2.756136  | 2.545577  |
| 31 | 6 | C | -0.300173  | 3.21926   | 4.979964  |
| 32 | 1 | H | -2.420052  | 2.936066  | 4.735558  |
| 33 | 1 | H | 1.842566   | 3.414919  | 4.922376  |
| 34 | 1 | H | -0.378257  | 3.5067    | 6.022864  |
| 35 | 6 | C | -0.072529  | 3.258268  | -1.422108 |
| 36 | 6 | C | -1.312673  | 3.561712  | -1.998734 |
| 37 | 6 | C | 1.082978   | 3.856763  | -1.942229 |
| 38 | 6 | C | -1.395346  | 4.445124  | -3.073503 |
| 39 | 1 | H | -2.213367  | 3.10222   | -1.608605 |
| 40 | 6 | C | 0.998047   | 4.73949   | -3.017572 |
| 41 | 1 | H | 2.048567   | 3.626193  | -1.507476 |
| 42 | 6 | C | -0.240379  | 5.034602  | -3.583722 |
| 43 | 1 | H | -2.360786  | 4.671521  | -3.51313  |
| 44 | 1 | H | 1.899181   | 5.195082  | -3.413687 |
| 45 | 1 | H | -0.305348  | 5.721233  | -4.420779 |
| 46 | 6 | C | -5.996509  | -1.238269 | -0.404665 |
| 47 | 6 | C | -6.67624   | -2.358027 | 0.109661  |
| 48 | 6 | C | -6.751621  | -0.174344 | -0.931774 |
| 49 | 6 | C | -8.060122  | -2.393048 | 0.096988  |
| 50 | 1 | H | -6.112314  | -3.177215 | 0.54212   |
| 51 | 6 | C | -8.140966  | -0.208134 | -0.953938 |
| 52 | 1 | H | -6.235299  | 0.678314  | -1.356363 |
| 53 | 6 | C | -8.997273  | -3.469283 | 0.603632  |
| 54 | 6 | C | -8.802417  | -1.321315 | -0.435102 |
| 55 | 1 | H | -8.69497   | 0.622047  | -1.377971 |
| 56 | 1 | H | -8.831022  | -4.427028 | 0.097276  |
| 57 | 6 | C | -10.363859 | -2.896026 | 0.292945  |
| 58 | 1 | H | -8.865462  | -3.651639 | 1.676363  |
| 59 | 6 | C | -10.230238 | -1.633351 | -0.317233 |
| 60 | 6 | C | -11.621491 | -3.435367 | 0.525307  |
| 61 | 6 | C | -11.360851 | -0.908398 | -0.69551  |

|    |   |   |            |           |           |
|----|---|---|------------|-----------|-----------|
| 62 | 6 | C | -12.751444 | -2.707524 | 0.145436  |
| 63 | 1 | H | -11.731341 | -4.407421 | 0.994892  |
| 64 | 6 | C | -12.620357 | -1.455064 | -0.459589 |
| 65 | 1 | H | -11.266771 | 0.064293  | -1.165779 |
| 66 | 1 | H | -13.73955  | -3.117519 | 0.321461  |
| 67 | 1 | H | -13.508395 | -0.903963 | -0.748048 |
| 68 | 6 | C | 6.101486   | -0.967493 | -0.345211 |
| 69 | 6 | C | 6.69767    | -2.13691  | 0.161003  |
| 70 | 6 | C | 6.931735   | 0.032378  | -0.883925 |
| 71 | 6 | C | 8.074285   | -2.28318  | 0.12667   |
| 72 | 1 | H | 6.075986   | -2.907801 | 0.603242  |
| 73 | 6 | C | 8.314011   | -0.111278 | -0.92491  |
| 74 | 1 | H | 6.478407   | 0.923777  | -1.301116 |
| 75 | 6 | C | 8.929448   | -3.431623 | 0.620132  |
| 76 | 6 | C | 8.892213   | -1.274066 | -0.416035 |
| 77 | 1 | H | 8.926245   | 0.673099  | -1.356307 |
| 78 | 1 | H | 8.798773   | -3.604141 | 1.694674  |
| 79 | 6 | C | 10.333267  | -2.969535 | 0.290218  |
| 80 | 1 | H | 8.680074   | -4.37255  | 0.116262  |
| 81 | 6 | C | 10.29235   | -1.699562 | -0.318246 |
| 82 | 6 | C | 11.546677  | -3.608116 | 0.505143  |
| 83 | 6 | C | 11.472342  | -1.06769  | -0.71205  |
| 84 | 6 | C | 12.726377  | -2.973198 | 0.109591  |
| 85 | 1 | H | 11.584467  | -4.586346 | 0.973407  |
| 86 | 6 | C | 12.687383  | -1.713827 | -0.493637 |
| 87 | 1 | H | 11.450144  | -0.090024 | -1.180974 |
| 88 | 1 | H | 13.680766  | -3.461365 | 0.271943  |
| 89 | 1 | H | 13.612571  | -1.235128 | -0.794589 |

#### M-TAz-PA

| Center Number | Atomic Number | Atom | Coordinates (Angstroms) |           |           |
|---------------|---------------|------|-------------------------|-----------|-----------|
|               |               |      | X                       | Y         | Z         |
| 1             | 50            | Sn   | -0.02264                | 1.735355  | 0.28532   |
| 2             | 8             | O    | -1.870519               | 1.061121  | -0.349912 |
| 3             | 8             | O    | 2.042366                | 1.617939  | 0.310833  |
| 4             | 6             | C    | -0.35631                | 1.55755   | 2.410085  |
| 5             | 6             | C    | -2.439826               | -0.123278 | -0.233826 |
| 6             | 6             | C    | -4.545143               | -1.397068 | -0.264366 |
| 7             | 6             | C    | -3.83912                | -0.199852 | -0.361104 |
| 8             | 1             | H    | -4.361102               | 0.73908   | -0.499541 |
| 9             | 6             | C    | -0.262781               | 3.789919  | -0.282435 |
| 10            | 6             | C    | -3.823009               | -2.593275 | -0.042701 |
| 11            | 1             | H    | -4.3441                 | -3.540885 | 0.003129  |
| 12            | 6             | C    | 4.600057                | -0.983477 | 0.225037  |
| 13            | 6             | C    | 3.996889                | 0.272944  | 0.277521  |



|    |   |   |           |           |           |
|----|---|---|-----------|-----------|-----------|
| 14 | 1 | H | 4.591908  | 1.176871  | 0.316977  |
| 15 | 6 | C | -2.453815 | -2.555155 | 0.065399  |
| 16 | 1 | H | -1.877952 | -3.461327 | 0.21099   |
| 17 | 6 | C | 3.780041  | -2.134763 | 0.142414  |
| 18 | 1 | H | 4.235826  | -3.116944 | 0.13611   |
| 19 | 6 | C | -1.721871 | -1.346951 | -0.016519 |
| 20 | 6 | C | 2.600235  | 0.419255  | 0.256394  |
| 21 | 6 | C | 2.405879  | -2.020291 | 0.111825  |
| 22 | 1 | H | 1.768346  | -2.893339 | 0.060373  |
| 23 | 6 | C | 1.801913  | -0.755498 | 0.163076  |
| 24 | 7 | N | -0.356397 | -1.523856 | 0.080739  |
| 25 | 7 | N | 0.424819  | -0.520651 | 0.112884  |
| 26 | 6 | C | -1.48818  | 4.272167  | -0.762742 |
| 27 | 6 | C | 0.798775  | 4.694981  | -0.139683 |
| 28 | 6 | C | 0.642344  | 6.040019  | -0.474264 |
| 29 | 6 | C | -1.646421 | 5.617158  | -1.098328 |
| 30 | 6 | C | -0.580871 | 6.503198  | -0.955215 |
| 31 | 1 | H | 1.758853  | 4.348274  | 0.228859  |
| 32 | 1 | H | 1.474861  | 6.725995  | -0.357537 |
| 33 | 1 | H | -2.327793 | 3.593491  | -0.872067 |
| 34 | 1 | H | -2.602898 | 5.973431  | -1.466717 |
| 35 | 1 | H | -0.703792 | 7.549528  | -1.213138 |
| 36 | 6 | C | 0.716545  | 1.520524  | 3.311948  |
| 37 | 6 | C | -1.657394 | 1.511822  | 2.930531  |
| 38 | 6 | C | -1.880591 | 1.425042  | 4.304393  |
| 39 | 6 | C | 0.497623  | 1.433594  | 4.686374  |
| 40 | 6 | C | -0.80227  | 1.384437  | 5.185343  |
| 41 | 1 | H | -2.51146  | 1.542938  | 2.261864  |
| 42 | 1 | H | -2.895863 | 1.38853   | 4.685584  |
| 43 | 1 | H | 1.735178  | 1.562716  | 2.941239  |
| 44 | 1 | H | 1.342082  | 1.404735  | 5.367248  |
| 45 | 1 | H | -0.973821 | 1.316512  | 6.254282  |
| 46 | 1 | H | -0.615123 | 1.630839  | -2.489831 |
| 47 | 1 | H | 0.402948  | 0.377179  | -2.293891 |
| 48 | 6 | C | 1.363243  | 2.116732  | -2.865952 |
| 49 | 1 | H | 2.32229   | 1.802939  | -2.447515 |
| 50 | 1 | H | 1.239895  | 3.172742  | -2.620387 |
| 51 | 6 | C | 1.351018  | 1.922985  | -4.38628  |
| 52 | 1 | H | 2.105493  | 2.594287  | -4.811094 |
| 53 | 1 | H | 0.386161  | 2.259658  | -4.785397 |
| 54 | 6 | C | 1.633579  | 0.488413  | -4.843967 |
| 55 | 1 | H | 1.664505  | 0.423951  | -5.934277 |
| 56 | 1 | H | 2.59631   | 0.135183  | -4.462035 |
| 57 | 1 | H | 0.863188  | -0.211273 | -4.505244 |
| 58 | 7 | N | 0.306289  | 1.377344  | -2.136818 |
| 59 | 6 | C | 6.076196  | -1.115838 | 0.258872  |

|     |   |   |            |           |           |
|-----|---|---|------------|-----------|-----------|
| 60  | 6 | C | 6.725392   | -2.104876 | -0.502498 |
| 61  | 6 | C | 6.858134   | -0.25639  | 1.052067  |
| 62  | 6 | C | 8.105414   | -2.213974 | -0.464755 |
| 63  | 1 | H | 6.141664   | -2.76177  | -1.138259 |
| 64  | 6 | C | 8.243639   | -0.364017 | 1.096686  |
| 65  | 1 | H | 6.364214   | 0.489317  | 1.663658  |
| 66  | 6 | C | 9.011867   | -3.179535 | -1.199555 |
| 67  | 6 | C | 8.874501   | -1.34645  | 0.333734  |
| 68  | 1 | H | 8.817562   | 0.306816  | 1.726586  |
| 69  | 1 | H | 8.786139   | -4.222432 | -0.948852 |
| 70  | 6 | C | 10.390804  | -2.771141 | -0.725247 |
| 71  | 1 | H | 8.9104     | -3.086755 | -2.287042 |
| 72  | 6 | C | 10.290963  | -1.692531 | 0.175483  |
| 73  | 6 | C | 11.630811  | -3.300378 | -1.054797 |
| 74  | 6 | C | 11.438646  | -1.142558 | 0.747355  |
| 75  | 6 | C | 12.778096  | -2.747815 | -0.480567 |
| 76  | 1 | H | 11.713954  | -4.131323 | -1.747813 |
| 77  | 6 | C | 12.680671  | -1.678171 | 0.412596  |
| 78  | 1 | H | 11.371073  | -0.312289 | 1.441828  |
| 79  | 1 | H | 13.75276   | -3.152157 | -0.729672 |
| 80  | 1 | H | 13.581278  | -1.261325 | 0.849439  |
| 81  | 6 | C | -6.020575  | -1.419808 | -0.392241 |
| 82  | 6 | C | -6.792156  | -2.304785 | 0.383116  |
| 83  | 6 | C | -6.680125  | -0.559221 | -1.288813 |
| 84  | 6 | C | -8.171122  | -2.312124 | 0.258556  |
| 85  | 1 | H | -6.303442  | -2.957611 | 1.098047  |
| 86  | 6 | C | -8.063853  | -0.567039 | -1.422405 |
| 87  | 1 | H | -6.091368  | 0.106471  | -1.908741 |
| 88  | 6 | C | -9.195935  | -3.153108 | 0.99062   |
| 89  | 6 | C | -8.817049  | -1.446082 | -0.644236 |
| 90  | 1 | H | -8.542385  | 0.100906  | -2.130194 |
| 91  | 1 | H | -9.038221  | -4.225082 | 0.82526   |
| 92  | 6 | C | -10.505098 | -2.676746 | 0.397326  |
| 93  | 1 | H | -9.15608   | -2.991172 | 2.073946  |
| 94  | 6 | C | -10.263439 | -1.673401 | -0.561593 |
| 95  | 6 | C | -11.801632 | -3.087458 | 0.674403  |
| 96  | 6 | C | -11.325225 | -1.079448 | -1.244704 |
| 97  | 6 | C | -12.862557 | -2.491282 | -0.011218 |
| 98  | 1 | H | -11.994272 | -3.859618 | 1.412101  |
| 99  | 6 | C | -12.624408 | -1.496019 | -0.9622   |
| 100 | 1 | H | -11.148176 | -0.306103 | -1.98416  |
| 101 | 1 | H | -13.880065 | -2.802951 | 0.196191  |
| 102 | 1 | H | -13.459748 | -1.043757 | -1.484978 |

M-TAz-EDA

| Center Number | Atomic Number | Atom | Coordinates (Angstroms) |           |           |
|---------------|---------------|------|-------------------------|-----------|-----------|
|               |               |      | X                       | Y         | Z         |
| 1             | 50            | Sn   | 0.049673                | 1.934817  | 0.002191  |
| 2             | 7             | N    | -0.322159               | -1.389867 | -0.00261  |
| 3             | 6             | C    | -1.690473               | -1.25999  | 0.055988  |
| 4             | 6             | C    | -2.373639               | -2.499703 | 0.057111  |
| 5             | 6             | C    | -2.457326               | -0.050314 | 0.118675  |
| 6             | 6             | C    | -3.744003               | -2.585016 | 0.111807  |
| 7             | 1             | H    | -1.758392               | -3.390996 | 0.022562  |
| 8             | 6             | C    | -3.863162               | -0.174579 | 0.179652  |
| 9             | 6             | C    | -4.518324               | -1.402122 | 0.177354  |
| 10            | 1             | H    | -4.227808               | -3.552939 | 0.14164   |
| 11            | 1             | H    | -4.428672               | 0.749838  | 0.195744  |
| 12            | 6             | C    | 1.827573                | -0.661172 | -0.08337  |
| 13            | 6             | C    | 2.674955                | 0.477706  | -0.129997 |
| 14            | 6             | C    | 2.378447                | -1.950744 | -0.09534  |
| 15            | 6             | C    | 4.065251                | 0.269656  | -0.185521 |
| 16            | 6             | C    | 3.746023                | -2.126725 | -0.148412 |
| 17            | 1             | H    | 1.704514                | -2.796607 | -0.071945 |
| 18            | 6             | C    | 4.614585                | -1.011127 | -0.195484 |
| 19            | 1             | H    | 4.700892                | 1.147001  | -0.189315 |
| 20            | 1             | H    | 4.156503                | -3.128141 | -0.188184 |
| 21            | 7             | N    | 0.453136                | -0.381612 | -0.026362 |
| 22            | 8             | O    | -1.936862               | 1.149591  | 0.115511  |
| 23            | 8             | O    | 2.168855                | 1.694894  | -0.112213 |
| 24            | 6             | C    | 0.121871                | 2.141398  | 2.153286  |
| 25            | 6             | C    | -1.037533               | 2.059004  | 2.936453  |
| 26            | 6             | C    | 1.34016                 | 2.363287  | 2.811986  |
| 27            | 6             | C    | -0.987431               | 2.213216  | 4.32247   |
| 28            | 1             | H    | -1.989342               | 1.845382  | 2.462714  |
| 29            | 6             | C    | 1.396152                | 2.516283  | 4.197815  |
| 30            | 1             | H    | 2.259644                | 2.391213  | 2.237202  |
| 31            | 6             | C    | 0.230318                | 2.447256  | 4.957007  |
| 32            | 1             | H    | -1.898774               | 2.139424  | 4.907023  |
| 33            | 1             | H    | 2.352401                | 2.679098  | 4.684295  |
| 34            | 1             | H    | 0.271895                | 2.562648  | 6.034671  |
| 35            | 6             | C    | -0.107306               | 2.142906  | -2.144238 |
| 36            | 6             | C    | -1.345506               | 2.057395  | -2.796589 |
| 37            | 6             | C    | 1.030938                | 2.366774  | -2.931562 |
| 38            | 6             | C    | -1.447569               | 2.209968  | -4.17988  |
| 39            | 1             | H    | -2.240017               | 1.844805  | -2.221017 |
| 40            | 6             | C    | 0.934616                | 2.519461  | -4.315267 |
| 41            | 1             | H    | 2.007971                | 2.39449   | -2.461861 |
| 42            | 6             | C    | -0.306684               | 2.446828  | -4.943151 |
| 43            | 1             | H    | -2.417099               | 2.132799  | -4.661181 |
| 44            | 1             | H    | 1.831414                | 2.685177  | -4.90344  |

|    |   |   |           |           |           |
|----|---|---|-----------|-----------|-----------|
| 45 | 1 | H | -0.382792 | 2.56168   | -6.018981 |
| 46 | 1 | H | 1.584158  | 4.298495  | 0.882369  |
| 47 | 1 | H | 1.92813   | 4.088871  | -0.700333 |
| 48 | 1 | H | -2.049188 | 3.843121  | -0.844216 |
| 49 | 1 | H | -2.313991 | 3.549879  | 0.741259  |
| 50 | 6 | C | 0.284017  | 5.326112  | -0.360784 |
| 51 | 1 | H | 0.728557  | 6.298924  | -0.120333 |
| 52 | 1 | H | 0.097283  | 5.306424  | -1.437861 |
| 53 | 6 | C | -1.035413 | 5.158722  | 0.394529  |
| 54 | 1 | H | -0.8488   | 5.185484  | 1.471474  |
| 55 | 1 | H | -1.708478 | 5.990323  | 0.155509  |
| 56 | 7 | N | 1.166945  | 4.19712   | -0.038542 |
| 57 | 7 | N | -1.61124  | 3.84556   | 0.072556  |
| 58 | 6 | C | 6.083478  | -1.205095 | -0.255429 |
| 59 | 6 | C | 6.70047   | -2.24187  | 0.467915  |
| 60 | 6 | C | 6.891569  | -0.357648 | -1.03537  |
| 61 | 6 | C | 8.074137  | -2.408437 | 0.406452  |
| 62 | 1 | H | 6.09673   | -2.890499 | 1.093296  |
| 63 | 6 | C | 8.27074   | -0.521869 | -1.103136 |
| 64 | 1 | H | 6.420482  | 0.425483  | -1.617687 |
| 65 | 6 | C | 8.94794   | -3.432394 | 1.100888  |
| 66 | 6 | H | 8.869312  | -1.551833 | -0.377847 |
| 67 | 1 | H | 8.864682  | 0.142042  | -1.722037 |
| 68 | 1 | H | 8.864441  | -3.366803 | 2.191881  |
| 69 | 6 | C | 10.337057 | -3.069642 | 0.619099  |
| 70 | 1 | H | 8.674626  | -4.457214 | 0.824257  |
| 71 | 6 | C | 10.271687 | -1.962199 | -0.24952  |
| 72 | 6 | C | 11.557384 | -3.660104 | 0.916259  |
| 73 | 6 | C | 11.434852 | -1.44579  | -0.821413 |
| 74 | 6 | C | 12.720313 | -3.140879 | 0.341981  |
| 75 | 1 | H | 11.613389 | -4.513328 | 1.584581  |
| 76 | 6 | C | 12.657193 | -2.043047 | -0.519283 |
| 77 | 1 | H | 11.394129 | -0.593804 | -1.491358 |
| 78 | 1 | H | 13.679817 | -3.59335  | 0.566121  |
| 79 | 1 | H | 13.56917  | -1.652381 | -0.956973 |
| 80 | 6 | C | -5.997329 | -1.473328 | 0.24258   |
| 81 | 6 | C | -6.699512 | -2.453354 | -0.482357 |
| 82 | 6 | C | -6.729563 | -0.566036 | 1.029985  |
| 83 | 6 | C | -8.081847 | -2.50625  | -0.416634 |
| 84 | 1 | H | -6.153443 | -3.147263 | -1.11207  |
| 85 | 6 | C | -8.117089 | -0.617763 | 1.103773  |
| 86 | 1 | H | -6.193659 | 0.17247   | 1.614475  |
| 87 | 6 | C | -9.039533 | -3.451548 | -1.111681 |
| 88 | 6 | C | -8.800768 | -1.591355 | 0.375735  |
| 89 | 1 | H | -8.652219 | 0.088485  | 1.729297  |
| 90 | 1 | H | -8.955861 | -3.38702  | -2.202696 |

|     |   |   |            |           |           |
|-----|---|---|------------|-----------|-----------|
| 91  | 6 | C | -10.391915 | -2.978965 | -0.620979 |
| 92  | 1 | H | -8.8495    | -4.496692 | -0.841568 |
| 93  | 6 | C | -10.232464 | -1.885119 | 0.252527  |
| 94  | 6 | C | -11.657809 | -3.466527 | -0.914424 |
| 95  | 6 | C | -11.346579 | -1.278369 | 0.833334  |
| 96  | 6 | C | -12.771361 | -2.857061 | -0.331323 |
| 97  | 1 | H | -11.78665  | -4.3089   | -1.586337 |
| 98  | 6 | C | -12.614878 | -1.772441 | 0.534917  |
| 99  | 1 | H | -11.233186 | -0.436208 | 1.50729   |
| 100 | 1 | H | -13.765655 | -3.228648 | -0.55234  |
| 101 | 1 | H | -13.489838 | -1.311246 | 0.979349  |

### M-TAz-phen

| Center Number | Atomic Number | Atom | Coordinates (Angstroms) |          |          |
|---------------|---------------|------|-------------------------|----------|----------|
|               |               |      | X                       | Y        | Z        |
| 1             | 50            | Sn   | 0.09798                 | 1.1629   | -0.00056 |
| 2             | 6             | C    | 0.22844                 | 1.44866  | 2.12274  |
| 3             | 6             | C    | 1.45804                 | 1.7311   | 2.73036  |
| 4             | 6             | C    | -0.89916                | 1.31745  | 2.9422   |
| 5             | 6             | C    | 1.556                   | 1.89031  | 4.11239  |
| 6             | 1             | H    | 2.35004                 | 1.8137   | 2.12207  |
| 7             | 6             | C    | -0.80491                | 1.47712  | 4.32434  |
| 8             | 1             | H    | -1.85794                | 1.07693  | 2.50002  |
| 9             | 6             | C    | 0.42341                 | 1.76731  | 4.91348  |
| 10            | 1             | H    | 2.51969                 | 2.10507  | 4.5626   |
| 11            | 1             | H    | -1.69133                | 1.36856  | 4.94088  |
| 12            | 1             | H    | 0.49871                 | 1.88863  | 5.98883  |
| 13            | 6             | C    | -0.15103                | 1.42882  | -2.11553 |
| 14            | 6             | C    | 0.96163                 | 1.61974  | -2.94431 |
| 15            | 6             | C    | -1.41671                | 1.37094  | -2.71109 |
| 16            | 6             | C    | 0.81304                 | 1.76096  | -4.32375 |
| 17            | 1             | H    | 1.95377                 | 1.64638  | -2.51088 |
| 18            | 6             | C    | -1.569                  | 1.51337  | -4.08997 |
| 19            | 1             | H    | -2.29301                | 1.20185  | -2.09762 |
| 20            | 6             | C    | -0.45379                | 1.71182  | -4.90044 |
| 21            | 1             | H    | 1.68908                 | 1.90441  | -4.94788 |
| 22            | 1             | H    | -2.55943                | 1.46303  | -4.53044 |
| 23            | 1             | H    | -0.57041                | 1.81956  | -5.97353 |
| 24            | 6             | C    | -1.60479                | -2.06492 | 0.03185  |
| 25            | 6             | C    | -2.27651                | -3.30968 | -0.00875 |
| 26            | 6             | C    | -2.37704                | -0.86405 | 0.14515  |
| 27            | 6             | C    | -3.64584                | -3.40762 | 0.05098  |
| 28            | 1             | H    | -1.65394                | -4.19364 | -0.08028 |
| 29            | 6             | C    | -3.78147                | -1.0018  | 0.21481  |
| 30            | 6             | C    | -4.4269                 | -2.23382 | 0.16956  |

|    |   |   |          |          |          |
|----|---|---|----------|----------|----------|
| 31 | 1 | H | -4.12334 | -4.37913 | 0.04605  |
| 32 | 1 | H | -4.36187 | -0.08856 | 0.2718   |
| 33 | 8 | O | -1.85682 | 0.33464  | 0.18675  |
| 34 | 6 | C | 1.90135  | -1.42597 | -0.09727 |
| 35 | 6 | C | 2.73239  | -0.2791  | -0.16915 |
| 36 | 6 | C | 2.46727  | -2.7086  | -0.08313 |
| 37 | 6 | C | 4.12502  | -0.46878 | -0.22315 |
| 38 | 6 | C | 3.83706  | -2.86802 | -0.13489 |
| 39 | 1 | H | 1.80405  | -3.56203 | -0.03972 |
| 40 | 6 | C | 4.69056  | -1.74271 | -0.20719 |
| 41 | 1 | H | 4.75332  | 0.41354  | -0.24557 |
| 42 | 1 | H | 4.26089  | -3.86449 | -0.15233 |
| 43 | 8 | O | 2.20486  | 0.92904  | -0.17862 |
| 44 | 7 | N | 0.52519  | -1.15796 | -0.04143 |
| 45 | 7 | N | -0.23659 | -2.17644 | -0.03228 |
| 46 | 6 | C | -1.08392 | 4.5418   | 0.08193  |
| 47 | 6 | C | -2.87949 | 3.11406  | 0.28844  |
| 48 | 6 | C | 0.34441  | 4.72979  | -0.06481 |
| 49 | 6 | C | -1.92634 | 5.68289  | 0.15056  |
| 50 | 6 | C | -3.79055 | 4.18019  | 0.36643  |
| 51 | 1 | H | -3.20408 | 2.08255  | 0.33678  |
| 52 | 6 | C | 0.86139  | 6.05007  | -0.13915 |
| 53 | 6 | C | -1.36272 | 6.99743  | 0.07158  |
| 54 | 6 | C | -3.31138 | 5.46723  | 0.29628  |
| 55 | 1 | H | -4.848   | 3.97524  | 0.47821  |
| 56 | 6 | C | 2.25536  | 6.20075  | -0.28181 |
| 57 | 6 | C | -0.02447 | 7.17352  | -0.06797 |
| 58 | 6 | C | 2.45064  | 3.81514  | -0.2601  |
| 59 | 1 | H | -2.03064 | 7.85006  | 0.12588  |
| 60 | 1 | H | -3.98093 | 6.31898  | 0.3512   |
| 61 | 6 | C | 3.05228  | 5.0819   | -0.34265 |
| 62 | 1 | H | 2.68083  | 7.19687  | -0.34141 |
| 63 | 1 | H | 0.39936  | 8.16996  | -0.12765 |
| 64 | 1 | H | 3.03249  | 2.90274  | -0.30206 |
| 65 | 1 | H | 4.12701  | 5.15795  | -0.45157 |
| 66 | 7 | N | -1.57253 | 3.28247  | 0.14995  |
| 67 | 7 | N | 1.14307  | 3.63988  | -0.12556 |
| 68 | 6 | C | 6.16179  | -1.9187  | -0.26473 |
| 69 | 6 | C | -5.90477 | -2.31803 | 0.24581  |
| 70 | 6 | C | -6.63344 | -1.4611  | 1.09073  |
| 71 | 6 | C | -6.60849 | -3.26045 | -0.52573 |
| 72 | 6 | C | -7.98983 | -3.32525 | -0.44937 |
| 73 | 6 | C | -8.01991 | -1.52571 | 1.17562  |
| 74 | 6 | C | -8.70555 | -2.46071 | 0.40043  |
| 75 | 1 | H | -6.06452 | -3.91462 | -1.19838 |
| 76 | 6 | C | -8.94946 | -4.23565 | -1.18699 |

|     |   |   |           |          |          |
|-----|---|---|-----------|----------|----------|
| 77  | 1 | H | -6.09507  | -0.75468 | 1.71164  |
| 78  | 1 | H | -8.55247  | -0.86002 | 1.84622  |
| 79  | 6 | C | -10.13683 | -2.75578 | 0.27519  |
| 80  | 6 | C | -10.29928 | -3.79954 | -0.65703 |
| 81  | 6 | C | -11.24816 | -2.18951 | 0.9005   |
| 82  | 6 | C | -12.51678 | -2.67348 | 0.58727  |
| 83  | 6 | C | -11.56549 | -4.27727 | -0.96499 |
| 84  | 6 | C | -12.67627 | -3.70832 | -0.33736 |
| 85  | 1 | H | -11.13239 | -1.38627 | 1.62004  |
| 86  | 1 | H | -13.38961 | -2.24347 | 1.06585  |
| 87  | 1 | H | -11.69668 | -5.08113 | -1.68209 |
| 88  | 1 | H | -13.67075 | -4.07278 | -0.56914 |
| 89  | 1 | H | -8.87722  | -4.10938 | -2.2734  |
| 90  | 1 | H | -8.75097  | -5.29315 | -0.978   |
| 91  | 6 | C | 6.95697   | -1.08432 | -1.07148 |
| 92  | 6 | C | 6.79356   | -2.92503 | 0.48814  |
| 93  | 6 | C | 8.1693    | -3.07467 | 0.42933  |
| 94  | 6 | C | 8.33822   | -1.23193 | -1.13681 |
| 95  | 6 | C | 8.95168   | -2.23124 | -0.38171 |
| 96  | 1 | H | 6.19922   | -3.56261 | 1.1336   |
| 97  | 1 | H | 6.47413   | -0.32632 | -1.67707 |
| 98  | 1 | H | 8.92225   | -0.57942 | -1.77692 |
| 99  | 6 | C | 10.35974  | -2.61834 | -0.24331 |
| 100 | 6 | C | 10.44132  | -3.69805 | 0.65822  |
| 101 | 6 | C | 11.51506  | -2.10348 | -0.83226 |
| 102 | 6 | C | 12.74586  | -2.67444 | -0.51404 |
| 103 | 6 | C | 11.67     | -4.2624  | 0.97128  |
| 104 | 6 | C | 12.82504  | -3.74477 | 0.3799   |
| 105 | 1 | H | 11.46186  | -1.27284 | -1.52766 |
| 106 | 1 | H | 13.6519   | -2.28469 | -0.9647  |
| 107 | 6 | C | 9.05789   | -4.06517 | 1.15285  |
| 108 | 1 | H | 11.73848  | -5.09418 | 1.66498  |
| 109 | 1 | H | 13.79093  | -4.17702 | 0.61619  |
| 110 | 1 | H | 8.79835   | -5.10148 | 0.90751  |
| 111 | 1 | H | 8.97466   | -3.96794 | 2.24149  |
